# Supplementary material for: Mechanistic insights into the metabolic pathways of vanillin: unraveling cytochrome P450 interaction mechanisms and implications for food safety
Source: Royal Society of Chemistry journal article supplement (doi:10.1039/d4ob00973h), 2024-01-01
Supplement: d4ob00973h1.pdf [file d4ob00973h1.pdf]

# Mechanistic Insights into Metabolic Pathways of Vanillin: Unraveling Cytochrome P450 Interaction Mechanisms and Implications for Food Safety

Emadeldin M. Kamel <sup>a\*</sup>, Saleh Maodaa <sup>b</sup>, Esam M. Al-Shaebi <sup>b</sup>, Al Mokhtar Lamsabhi <sup>c,d</sup>

<sup>a</sup> Chemistry Department, Faculty of Science, Beni-Suef University, Beni-Suef 62514, Egypt

<sup>b</sup> Department of Zoology, College of Science, King Saud University, PO Box -2455, Riyadh, 11451, Saudi Arabia

<sup>c</sup> Departamento de Química, Módulo 13, Universidad Autónoma de Madrid, Campus de Excelencia UAM-CSIC Cantoblanco, 28049 Madrid, Spain

<sup>d</sup> Institute for Advanced Research in Chemical Sciences (IAdChem), Universidad Autónoma de Madrid, 28049 Madrid, Spain

Email: [emad.abdelhameed@science.bsu.edu.eg](mailto:emad.abdelhameed@science.bsu.edu.eg)

## Table of Contents

|                                                                                                                                                                                         |      |
|-----------------------------------------------------------------------------------------------------------------------------------------------------------------------------------------|------|
| Table S1. Relative energies (RE) (in kcal/mol) and atomic energies (in a.u.) at the B3LYP level of theory for the mechanism of vanillin deformylation by CYP450 (Path A).....           | 2    |
| Table S2. Relative energies (RE) (in kcal/mol) and atomic energies (in a.u.) at the B3LYP level of theory for the mechanism of methoxy dealkylation of vanillin by CYP450 (Path B)..... | 2    |
| Table S3. Relative energies (RE) (in kcal/mol) and atomic energies (in a.u.) at the B3LYP level of theory for the mechanism of acetal formation from vanillin by CYP450 (Path C).....   | 3    |
| Cartesian coordinates of all structures represented in this investigation.....                                                                                                          | 4-45 |

**Relative energies (RE) (in kcal/mol) and atomic energies (in a.u.) at the B3LYP level of theory for the mechanism of vanillin deformylation by CYP450 (Path A)**

|                                   | UB3LYP/BS1     |        | UB3LYP/BS1+ZPE |        | UB3LYP/BS2//BS1 |        | UB3LYP/BS2//BS1+ZPE |        | UB3LYP/BS2//BS1 +Bulk Polarity |        | UB3LYP/BS2//BS1+ZPE +Bulk Polarity |        |
|-----------------------------------|----------------|--------|----------------|--------|-----------------|--------|---------------------|--------|--------------------------------|--------|------------------------------------|--------|
|                                   | AE             | RE     | AE             | RE     | AE              | RE     | AE                  | RE     | AE                             | RE     | AE                                 | RE     |
| <sup>2</sup> RC <sub>A</sub>      | -2120.84996200 | 0.00   | -2120.41187200 | 0.00   | -2121.86456200  | 0.00   | -2121.42647200      | 0.00   | -2121.88321900                 | 0.00   | -2121.44512900                     | 0.00   |
| <sup>4</sup> RC <sub>A</sub>      | -2120.85013900 | -0.11  | -2120.41202800 | -0.10  | -2121.86445600  | 0.07   | -2121.42634500      | 0.08   | -2121.88311370                 | 0.07   | -2121.44500270                     | 0.08   |
| <sup>2</sup> TS-O <sub>A</sub>    | -2120.81193300 | 23.86  | -2120.37531200 | 22.94  | -2121.84314700  | 13.44  | -2121.40652600      | 12.52  | -2121.86464600                 | 11.65  | -2121.42802500                     | 10.73  |
| <sup>4</sup> TS-O <sub>A</sub>    | -2120.81660200 | 20.93  | -2120.37962300 | 20.24  | -2121.84623200  | 11.50  | -2121.40925300      | 10.81  | -2121.86772900                 | 9.72   | -2121.43075000                     | 9.02   |
| <sup>2</sup> INT-O <sub>A</sub>   | -2120.83276000 | 10.79  | -2120.39394200 | 11.25  | -2121.86811300  | -2.23  | -2121.42929500      | -1.77  | -2121.88583                    | -1.64  | -2121.44701200                     | -1.18  |
| <sup>4</sup> INT-O <sub>A</sub>   | -2120.83043900 | 12.25  | -2120.39267300 | 12.05  | -2121.86374700  | 0.51   | -2121.42598100      | 0.31   | -2121.88182                    | 0.88   | -2121.44405200                     | 0.68   |
| <sup>2</sup> TS-def <sub>A</sub>  | -2120.80015000 | 31.26  | -2120.36531600 | 29.21  | -2121.83875300  | 16.20  | -2121.40391900      | 14.15  | -2121.863245                   | 12.53  | -2121.42841100                     | 10.49  |
| <sup>4</sup> TS-def <sub>A</sub>  | -2120.79986200 | 31.44  | -2120.36416300 | 29.94  | -2121.84650500  | 11.33  | -2121.41080600      | 9.83   | -2121.86659                    | 10.43  | -2121.43089100                     | 8.93   |
| <sup>2</sup> INT-def <sub>A</sub> | -2120.83431100 | 9.82   | -2120.39794900 | 8.74   | -2121.86527200  | -0.45  | -2121.42891000      | -1.53  | -2121.88193200                 | 0.81   | -2121.44557000                     | -0.28  |
| <sup>4</sup> INT-def <sub>A</sub> | -2120.83437800 | 9.78   | -2120.39798600 | 8.71   | -2121.86804000  | -2.18  | -2121.43164800      | -3.25  | -2121.88322600                 | 0.00   | -2121.44683400                     | -1.07  |
| <sup>2</sup> P-OH <sub>A</sub>    | -2120.90218900 | -32.77 | -2120.45953400 | -29.91 | -2121.93680600  | -45.33 | -2121.49415100      | -42.47 | -2121.95956700                 | -47.91 | -2121.51691200                     | -45.04 |
| <sup>4</sup> P-OH <sub>A</sub>    | -2120.88170300 | -19.92 | -2120.44335000 | -19.75 | -2121.91248800  | -30.07 | -2121.47413500      | -29.91 | -2121.93174200                 | -30.45 | -2121.49338900                     | -30.28 |

**Table S2. Relative energies (RE) (in kcal/mol) and atomic energies (in a.u.) at the B3LYP level of theory for the mechanism of methoxy dealkylation of vanillin by CYP450 (Path B)**

|                                  | UB3LYP/BS1     |        | UB3LYP/BS1+ZPE |        | UB3LYP/BS2//BS1 |        | UB3LYP/BS2//BS1+ZPE |        | UB3LYP/BS2//BS1 +Bulk Polarity |        | UB3LYP/BS2//BS1+ZPE +Bulk Polarity |        |
|----------------------------------|----------------|--------|----------------|--------|-----------------|--------|---------------------|--------|--------------------------------|--------|------------------------------------|--------|
|                                  | AE             | RE     | AE             | RE     | AE              | RE     | AE                  | RE     | AE                             | RE     | AE                                 | RE     |
| <sup>2</sup> RC <sub>B</sub>     | -2120.86782300 | 0.00   | -2120.42988500 | 0.00   | -2121.89414600  | 0.00   | -2121.45620800      | 0.00   | -2121.91111500                 | 0.00   | -2121.47317700                     | 0.00   |
| <sup>4</sup> RC <sub>B</sub>     | -2120.86790300 | -0.05  | -2120.42980300 | 0.05   | -2121.89404800  | 0.06   | -2121.45594800      | 0.16   | -2121.91095700                 | 0.10   | -2121.47285700                     | 0.20   |
| <sup>2</sup> TS-H <sub>B</sub>   | -2120.84172500 | 16.38  | -2120.40951500 | 12.78  | -2121.86218500  | 20.06  | -2121.42997500      | 16.46  | -2121.87941200                 | 19.89  | -2121.44720200                     | 16.30  |
| <sup>4</sup> TS-H <sub>B</sub>   | -2120.84063000 | 17.06  | -2120.40929700 | 12.92  | -2121.86819800  | 16.28  | -2121.43686500      | 12.14  | -2121.88397400                 | 17.03  | -2121.45264100                     | 12.89  |
| <sup>2</sup> INT <sub>B</sub>    | -2120.83764900 | 18.93  | -2120.40203900 | 17.47  | -2121.88265700  | 7.21   | -2121.44704700      | 5.75   | -2121.89657                    | 9.13   | -2121.46096300                     | 7.66   |
| <sup>4</sup> INT <sub>B</sub>    | -2120.83748400 | 19.04  | -2120.40190200 | 17.56  | -2121.88255600  | 7.27   | -2121.44697400      | 5.79   | -2121.89648                    | 9.19   | -2121.46089500                     | 7.71   |
| <sup>4</sup> TS-reb <sub>B</sub> | -2120.84942100 | 11.55  | -2120.41667200 | 8.29   | -2121.88940300  | 2.98   | -2121.45665400      | -0.28  | -2121.905339                   | 3.62   | -2121.47259000                     | 0.37   |
| <sup>2</sup> P-OH <sub>B</sub>   | -2120.93233200 | -40.48 | -2120.49082500 | -38.24 | -2121.97646200  | -51.65 | -2121.53495500      | -49.41 | -2121.99486700                 | -52.56 | -2121.55336000                     | -50.32 |
| <sup>4</sup> P-OH <sub>B</sub>   | -2120.91394200 | -28.94 | -2120.47378900 | -27.55 | -2121.96098900  | -41.94 | -2121.52083600      | -40.55 | -2121.98052600                 | -43.56 | -2121.54037300                     | -42.17 |

**Table S3. Relative energies (RE) (in kcal/mol) and atomic energies (in a.u.) at the B3LYP level of theory for the mechanism of acetal formation from vanillin by CYP450 (Path C)**

|                                  | UB3LYP/BS1     |        | UB3LYP/BS1+ZPE |        | UB3LYP/BS2//BS1 |        | UB3LYP/BS2//BS1+ZPE |        | UB3LYP/BS2//BS1<br>+Bulk Polarity |        | UB3LYP/BS2//BS1+ZPE+<br>Bulk Polarity |        |
|----------------------------------|----------------|--------|----------------|--------|-----------------|--------|---------------------|--------|-----------------------------------|--------|---------------------------------------|--------|
|                                  | AE             | RE     | AE             | RE     | AE              | RE     | AE                  | RE     | AE                                | RE     | AE                                    | RE     |
| <sup>2</sup> RC <sub>C</sub>     | -2120.86743000 | 0.00   | -2120.42950400 | 0.00   | -2121.89356600  | 0.00   | -2121.45564000      | 0.00   | -2121.91119300                    | 0.00   | -2121.47326700                        | 0.00   |
| <sup>4</sup> RC <sub>C</sub>     | -2120.86958500 | -1.35  | -2120.43096200 | -0.91  | -2121.89673700  | -1.99  | -2121.45811400      | -1.55  | -2121.91545600                    | -2.68  | -2121.47683300                        | -2.24  |
| <sup>2</sup> TS1-H <sub>C</sub>  | -2120.84172500 | 16.13  | -2120.40951500 | 12.54  | -2121.86218500  | 19.69  | -2121.42997500      | 16.11  | -2121.87941200                    | 19.94  | -2121.44720200                        | 16.36  |
| <sup>4</sup> TS1-H <sub>C</sub>  | -2120.84063000 | 16.82  | -2120.40929700 | 12.68  | -2121.86819800  | 15.92  | -2121.43686500      | 11.78  | -2121.88397400                    | 17.08  | -2121.45264100                        | 12.94  |
| <sup>2</sup> INT1-H <sub>C</sub> | -2120.83764900 | 18.69  | -2120.40203900 | 17.23  | -2121.88265700  | 6.85   | -2121.44704700      | 5.39   | -2121.89657                       | 9.17   | -2121.46096300                        | 7.72   |
| <sup>4</sup> INT1-H <sub>C</sub> | -2120.83748400 | 18.79  | -2120.40190200 | 17.32  | -2121.88255600  | 6.91   | -2121.44697400      | 5.44   | -2121.89648                       | 9.23   | -2121.46089500                        | 7.76   |
| <sup>2</sup> TS1-H <sub>C</sub>  | -2120.85643200 | 6.90   | -2120.42371400 | 3.63   | -2121.88432400  | 5.80   | -2121.45160600      | 2.53   | -2121.901245                      | 6.24   | -2121.46852700                        | 2.97   |
| <sup>4</sup> TS1-H <sub>C</sub>  | -2120.85709100 | 6.49   | -2120.42670400 | 1.76   | -2121.88551600  | 5.05   | -2121.45512900      | 0.32   | -2121.903285                      | 4.96   | -2121.47289800                        | 0.23   |
| <sup>2</sup> INT2-H <sub>C</sub> | -2120.85742500 | 6.28   | -2120.42905500 | 0.28   | -2121.87653240  | 10.69  | -2121.44816240      | 4.69   | -2121.89101400                    | 12.66  | -2121.46264400                        | 6.67   |
| <sup>4</sup> INT2-H <sub>C</sub> | -2120.85938600 | 5.05   | -2120.42466500 | 3.04   | -2121.87930600  | 8.95   | -2121.44458500      | 6.94   | -2121.89793600                    | 8.32   | -2121.46321500                        | 6.31   |
| <sup>2</sup> P-epo <sub>C</sub>  | -2120.93547200 | -42.70 | -2120.49406700 | -40.51 | -2121.97463600  | -50.87 | -2121.53323100      | -48.69 | -2121.99255900                    | -51.06 | -2121.55115400                        | -48.87 |
| <sup>4</sup> P-epo <sub>C</sub>  | -2120.91867600 | -32.16 | -2120.47943100 | -31.33 | -2121.96011000  | -41.76 | -2121.52086500      | -40.93 | -2121.97711900                    | -41.37 | -2121.53787400                        | -40.54 |

**Cartesian coordinates of all structures represented in this study.**

**Path A**

**<sup>2</sup>RC<sub>A</sub>**

|    |          |          |          |
|----|----------|----------|----------|
| Fe | -1.49341 | -0.09561 | 0.10746  |
| O  | -0.78157 | -0.0002  | -1.38072 |
| S  | -2.25787 | -0.09451 | 2.51857  |
| H  | -1.77029 | -1.34125 | 2.86119  |
| N  | -1.51213 | -2.11    | 0.11895  |
| C  | -2.09066 | -4.31394 | -0.31754 |
| C  | -0.85237 | -4.32855 | 0.26155  |
| H  | -2.68433 | -5.15086 | -0.65385 |
| H  | -0.23137 | -5.18027 | 0.49635  |
| N  | 0.25169  | -0.12785 | 1.13176  |
| C  | 1.03434  | -1.24678 | 1.41971  |
| C  | 2.27727  | -0.83229 | 2.03107  |
| C  | 2.25937  | 0.53013  | 2.10155  |
| H  | 3.06417  | -1.50559 | 2.33542  |
| H  | 3.02776  | 1.18999  | 2.47366  |
| N  | -1.57106 | 1.9014   | 0.35488  |
| C  | -0.57452 | 2.72145  | 0.85501  |
| C  | -2.58351 | 2.75124  | -0.07561 |
| C  | -0.96335 | 4.10925  | 0.72888  |
| C  | -2.20452 | 4.12784  | 0.16177  |
| H  | -0.34835 | 4.94264  | 1.03149  |
| H  | -2.81705 | 4.98176  | -0.08559 |
| N  | -3.36227 | -0.07953 | -0.61696 |
| C  | -5.38926 | 0.62626  | -1.4921  |
| H  | -6.16908 | 1.30699  | -1.79917 |
| C  | -4.13487 | 1.03112  | -0.89621 |
| C  | -2.49944 | -2.93005 | -0.40719 |
| C  | -0.49545 | -2.95341 | 0.53214  |
| C  | 1.00319  | 0.97406  | 1.5403   |
| C  | -3.77357 | 2.3476   | -0.64663 |
| H  | -4.48107 | 3.12003  | -0.9271  |
| C  | -3.70386 | -2.497   | -0.93337 |
| H  | -4.38866 | -3.25301 | -1.30156 |
| C  | 0.68775  | -2.55146 | 1.13702  |
| H  | 1.39503  | -3.32613 | 1.41245  |
| C  | 0.62458  | 2.29224  | 1.40011  |
| H  | 1.32462  | 3.05255  | 1.72433  |
| C  | -5.36982 | -0.73765 | -1.57394 |
| H  | -6.13064 | -1.39841 | -1.96177 |
| C  | -4.10357 | -1.1748  | -1.02828 |
| C  | 1.8143   | 2.13248  | -1.53915 |
| H  | 0.81978  | 1.8507   | -1.91701 |
| O  | 2.09416  | 3.32662  | -1.31061 |

|                                   |          |          |          |
|-----------------------------------|----------|----------|----------|
| C                                 | 2.73586  | 1.01388  | -1.304   |
| C                                 | 4.02671  | 1.24783  | -0.7966  |
| C                                 | 2.31481  | -0.30003 | -1.56205 |
| C                                 | 4.88785  | 0.1921   | -0.53063 |
| H                                 | 4.35065  | 2.26154  | -0.59441 |
| C                                 | 3.17895  | -1.36331 | -1.3056  |
| H                                 | 1.30276  | -0.47854 | -1.90892 |
| C                                 | 4.45383  | -1.1274  | -0.78437 |
| H                                 | 2.85066  | -2.38468 | -1.47999 |
| O                                 | 6.11707  | 0.47558  | 0.06133  |
| O                                 | 5.32863  | -2.16281 | -0.47282 |
| H                                 | 4.94513  | -3.02959 | -0.70691 |
| C                                 | 7.32521  | -0.00137 | -0.6209  |
| H                                 | 8.15353  | 0.41525  | -0.04848 |
| H                                 | 7.36575  | -1.09134 | -0.62007 |
| H                                 | 7.35429  | 0.37801  | -1.64882 |
| <b><sup>4</sup>RC<sub>A</sub></b> |          |          |          |
| Fe                                | -1.48016 | -0.09445 | 0.1145   |
| O                                 | -0.80177 | -0.01391 | -1.39317 |
| S                                 | -2.26686 | -0.09851 | 2.50319  |
| H                                 | -1.7748  | -1.34115 | 2.85387  |
| N                                 | -1.50234 | -2.11034 | 0.1224   |
| C                                 | -2.08766 | -4.31314 | -0.31119 |
| C                                 | -0.84623 | -4.33038 | 0.26095  |
| H                                 | -2.68468 | -5.14879 | -0.64475 |
| H                                 | -0.22564 | -5.18337 | 0.49223  |
| N                                 | 0.26204  | -0.13013 | 1.13156  |
| C                                 | 1.04252  | -1.25048 | 1.42137  |
| C                                 | 2.28178  | -0.83825 | 2.04125  |
| C                                 | 2.26271  | 0.52372  | 2.1189   |
| H                                 | 3.06698  | -1.51291 | 2.34701  |
| H                                 | 3.02836  | 1.18205  | 2.49931  |
| N                                 | -1.55588 | 1.9013   | 0.35725  |
| C                                 | -0.5641  | 2.72043  | 0.86826  |
| C                                 | -2.56688 | 2.75238  | -0.07591 |
| C                                 | -0.95309 | 4.10822  | 0.74538  |
| C                                 | -2.19007 | 4.12812  | 0.16925  |
| H                                 | -0.34097 | 4.94088  | 1.0557   |
| H                                 | -2.80156 | 4.98259  | -0.0788  |
| N                                 | -3.35169 | -0.07588 | -0.61515 |
| C                                 | -5.37197 | 0.63264  | -1.50329 |
| H                                 | -6.14757 | 1.31471  | -1.81796 |
| C                                 | -4.11864 | 1.03579  | -0.90325 |
| C                                 | -2.49434 | -2.92832 | -0.3986  |
| C                                 | -0.48583 | -2.95596 | 0.53068  |
| C                                 | 1.00983  | 0.97002  | 1.55276  |

|                                     |          |          |          |
|-------------------------------------|----------|----------|----------|
| C                                   | -3.75458 | 2.35146  | -0.65363 |
| H                                   | -4.45875 | 3.12572  | -0.93743 |
| C                                   | -3.69947 | -2.49347 | -0.92156 |
| H                                   | -4.38702 | -3.24897 | -1.28572 |
| C                                   | 0.69783  | -2.55479 | 1.13484  |
| H                                   | 1.40536  | -3.32941 | 1.40975  |
| C                                   | 0.63203  | 2.28886  | 1.41776  |
| H                                   | 1.32994  | 3.04745  | 1.7505   |
| C                                   | -5.35763 | -0.73168 | -1.57683 |
| H                                   | -6.11904 | -1.39177 | -1.96463 |
| C                                   | -4.09504 | -1.17056 | -1.02313 |
| C                                   | 1.78815  | 2.12789  | -1.54308 |
| H                                   | 0.79355  | 1.84315  | -1.91901 |
| O                                   | 2.06506  | 3.32286  | -1.31601 |
| C                                   | 2.71302  | 1.01192  | -1.30892 |
| C                                   | 4.00388  | 1.24943  | -0.80317 |
| C                                   | 2.29539  | -0.30306 | -1.56675 |
| C                                   | 4.86826  | 0.19608  | -0.53846 |
| H                                   | 4.32513  | 2.26398  | -0.60097 |
| C                                   | 3.16288  | -1.36399 | -1.31195 |
| H                                   | 1.28363  | -0.48455 | -1.91327 |
| C                                   | 4.43767  | -1.12462 | -0.79221 |
| H                                   | 2.8372   | -2.38621 | -1.48613 |
| O                                   | 6.0969   | 0.48297  | 0.05282  |
| O                                   | 5.31567  | -2.1576  | -0.48191 |
| H                                   | 4.93417  | -3.02548 | -0.71518 |
| C                                   | 7.3063   | 0.00855  | -0.629   |
| H                                   | 8.13347  | 0.42801  | -0.05701 |
| H                                   | 7.34976  | -1.08129 | -0.62711 |
| H                                   | 7.33431  | 0.387    | -1.65728 |
| <b><sup>2</sup>TS-O<sub>A</sub></b> |          |          |          |
| Fe                                  | 1.2362   | 0.36168  | -0.11389 |
| O                                   | -0.25774 | -0.36392 | 0.33317  |
| S                                   | 3.31606  | 1.32013  | -0.8523  |
| H                                   | 4.11741  | 0.81064  | 0.15088  |
| N                                   | 1.97401  | 0.31428  | 1.75235  |
| C                                   | 2.46599  | 0.86587  | 3.95026  |
| C                                   | 2.92124  | -0.40521 | 3.7406   |
| H                                   | 2.51497  | 1.45661  | 4.85269  |
| H                                   | 3.4212   | -1.0631  | 4.43551  |
| N                                   | 2.07051  | -1.43254 | -0.47224 |
| C                                   | 2.71173  | -2.25967 | 0.44295  |
| C                                   | 3.13336  | -3.47759 | -0.21049 |
| C                                   | 2.75865  | -3.38591 | -1.51859 |
| H                                   | 3.64549  | -4.28836 | 0.28509  |
| H                                   | 2.90224  | -4.10621 | -2.30974 |

|                                     |          |          |          |
|-------------------------------------|----------|----------|----------|
| N                                   | 0.68128  | 0.49997  | -2.04382 |
| C                                   | 0.89538  | -0.43869 | -3.03299 |
| C                                   | -0.07459 | 1.5097   | -2.6251  |
| C                                   | 0.27786  | -0.00622 | -4.26651 |
| C                                   | -0.32619 | 1.19374  | -4.01272 |
| H                                   | 0.30461  | -0.56198 | -5.19167 |
| H                                   | -0.88891 | 1.81845  | -4.68997 |
| N                                   | 0.50632  | 2.20901  | 0.2122   |
| C                                   | -0.61836 | 4.22079  | -0.03046 |
| H                                   | -1.19859 | 4.99747  | -0.50573 |
| C                                   | -0.22851 | 2.98247  | -0.66819 |
| C                                   | 1.86506  | 1.31082  | 2.71256  |
| C                                   | 2.61291  | -0.74537 | 2.36929  |
| C                                   | 2.09647  | -2.11159 | -1.68653 |
| C                                   | -0.51262 | 2.65283  | -1.98339 |
| H                                   | -1.10083 | 3.35727  | -2.56061 |
| C                                   | 1.23943  | 2.53064  | 2.539    |
| H                                   | 1.23049  | 3.21186  | 3.38254  |
| C                                   | 2.94812  | -1.94813 | 1.76442  |
| H                                   | 3.45317  | -2.68969 | 2.37258  |
| C                                   | 1.55489  | -1.65168 | -2.86795 |
| H                                   | 1.63831  | -2.29294 | -3.73806 |
| C                                   | -0.10232 | 4.19775  | 1.23447  |
| H                                   | -0.17871 | 4.94958  | 2.00559  |
| C                                   | 0.59581  | 2.93943  | 1.38267  |
| C                                   | -0.85714 | -1.89794 | -0.19693 |
| H                                   | -0.73651 | -1.71724 | -1.27615 |
| O                                   | -0.13641 | -2.84635 | 0.31922  |
| C                                   | -2.27914 | -1.7213  | 0.26048  |
| C                                   | -2.76577 | -2.41916 | 1.36904  |
| C                                   | -3.11039 | -0.8218  | -0.41786 |
| C                                   | -4.08403 | -2.22204 | 1.78494  |
| H                                   | -2.11085 | -3.10862 | 1.88732  |
| C                                   | -4.42451 | -0.6168  | -0.00698 |
| H                                   | -2.74132 | -0.2529  | -1.26361 |
| C                                   | -4.91725 | -1.33145 | 1.10181  |
| H                                   | -4.47324 | -2.76849 | 2.64051  |
| O                                   | -5.2166  | 0.25286  | -0.7574  |
| O                                   | -6.24494 | -1.1179  | 1.47125  |
| H                                   | -6.49402 | -1.68679 | 2.22413  |
| C                                   | -5.83246 | 1.37568  | -0.04377 |
| H                                   | -6.32026 | 1.96855  | -0.81754 |
| H                                   | -6.56197 | 1.01822  | 0.68433  |
| H                                   | -5.06181 | 1.97444  | 0.4563   |
| <b><sup>4</sup>TS-O<sub>A</sub></b> |          |          |          |
| Fe                                  | 1.17005  | 0.25409  | -0.36342 |

|   |          |          |          |
|---|----------|----------|----------|
| O | 0.12715  | -0.15612 | 0.9452   |
| S | 2.60526  | 0.66503  | -2.20357 |
| H | 3.69182  | -0.06139 | -1.7581  |
| N | 1.22588  | 2.157    | 0.2189   |
| C | 0.68175  | 4.38133  | 0.57137  |
| C | 1.85123  | 4.14238  | 1.23543  |
| H | 0.12535  | 5.3041   | 0.50264  |
| H | 2.43931  | 4.82793  | 1.82701  |
| N | 2.77553  | -0.15924 | 0.7655   |
| C | 3.51172  | 0.74226  | 1.51328  |
| C | 4.51732  | 0.03544  | 2.27889  |
| C | 4.35592  | -1.29591 | 2.01769  |
| H | 5.2267   | 0.50824  | 2.94141  |
| H | 4.91116  | -2.13077 | 2.41792  |
| N | 1.16727  | -1.65609 | -1.02869 |
| C | 1.9257   | -2.70928 | -0.53113 |
| C | 0.41249  | -2.17986 | -2.07746 |
| C | 1.62581  | -3.91466 | -1.26919 |
| C | 0.70873  | -3.58546 | -2.22951 |
| H | 2.07332  | -4.8776  | -1.07407 |
| H | 0.2559   | -4.22798 | -2.96964 |
| N | -0.32986 | 0.68109  | -1.62203 |
| C | -2.01296 | 0.5047   | -3.20634 |
| H | -2.63363 | 0.06024  | -3.96933 |
| C | -0.90419 | -0.164   | -2.56081 |
| C | 0.30141  | 3.14374  | -0.07644 |
| C | 2.18398  | 2.74935  | 1.02258  |
| C | 3.27207  | -1.41354 | 1.06561  |
| C | -0.53821 | -1.48032 | -2.79611 |
| H | -1.07766 | -2.01682 | -3.56834 |
| C | -0.78168 | 2.99744  | -0.92623 |
| H | -1.43027 | 3.85512  | -1.06489 |
| C | 3.26582  | 2.10218  | 1.59658  |
| H | 3.93159  | 2.69407  | 2.21465  |
| C | 2.85461  | -2.60446 | 0.48972  |
| H | 3.34145  | -3.51521 | 0.81836  |
| C | -2.11472 | 1.74692  | -2.64635 |
| H | -2.82476 | 2.5278   | -2.87353 |
| C | -1.05802 | 1.85948  | -1.66485 |
| C | -0.53303 | -1.67738 | 1.4341   |
| H | -0.32151 | -2.15839 | 0.46008  |
| O | 0.16509  | -2.1388  | 2.42271  |
| C | -1.96571 | -1.28956 | 1.60005  |
| C | -2.54365 | -1.18802 | 2.86936  |
| C | -2.72558 | -0.97587 | 0.46486  |
| C | -3.87179 | -0.77617 | 2.99522  |



|                                      |          |          |          |
|--------------------------------------|----------|----------|----------|
| H                                    | -1.9479  | -1.43089 | 3.74115  |
| C                                    | -4.04687 | -0.56067 | 0.58107  |
| H                                    | -2.29401 | -1.03162 | -0.52596 |
| C                                    | -4.62697 | -0.46271 | 1.86009  |
| H                                    | -4.32757 | -0.69581 | 3.97901  |
| O                                    | -4.76454 | -0.30698 | -0.58999 |
| O                                    | -5.95487 | -0.04846 | 1.9352   |
| H                                    | -6.27272 | -0.05404 | 2.85804  |
| C                                    | -5.28032 | 1.05485  | -0.75315 |
| H                                    | -5.74371 | 1.06735  | -1.73976 |
| H                                    | -6.0171  | 1.28365  | 0.01885  |
| H                                    | -4.45477 | 1.77526  | -0.72002 |
| <b><sup>2</sup>INT-O<sub>A</sub></b> |          |          |          |
| Fe                                   | -1.15936 | 0.12269  | 0.34761  |
| O                                    | -0.41452 | 0.00078  | -1.30585 |
| S                                    | -2.19185 | 0.3196   | 2.4278   |
| H                                    | -3.44553 | -0.08964 | 2.01943  |
| N                                    | -2.53963 | 1.3647   | -0.41315 |
| C                                    | -3.652   | 3.27136  | -1.10538 |
| C                                    | -4.41193 | 2.20165  | -1.48553 |
| H                                    | -3.84671 | 4.32222  | -1.25921 |
| H                                    | -5.35545 | 2.20052  | -2.01064 |
| N                                    | -2.35325 | -1.44837 | -0.06001 |
| C                                    | -3.55744 | -1.41582 | -0.75017 |
| C                                    | -4.07662 | -2.75763 | -0.87937 |
| C                                    | -3.18761 | -3.59757 | -0.26748 |
| H                                    | -5.00188 | -3.00767 | -1.37668 |
| H                                    | -3.2402  | -4.67127 | -0.16553 |
| N                                    | 0.18867  | -1.12159 | 1.17992  |
| C                                    | 0.06828  | -2.49829 | 1.3297   |
| C                                    | 1.40345  | -0.77292 | 1.75383  |
| C                                    | 1.23984  | -3.01743 | 1.99559  |
| C                                    | 2.06332  | -1.95639 | 2.25085  |
| H                                    | 1.3956   | -4.06018 | 2.22922  |
| H                                    | 3.02908  | -1.95489 | 2.73334  |
| N                                    | -0.01218 | 1.68322  | 0.85916  |
| C                                    | 1.77172  | 2.98622  | 1.5564   |
| H                                    | 2.75087  | 3.22079  | 1.94363  |
| C                                    | 1.2487   | 1.64454  | 1.43738  |
| C                                    | -2.47897 | 2.74721  | -0.44048 |
| C                                    | -3.7184  | 1.00915  | -1.04999 |
| C                                    | -2.10843 | -2.78195 | 0.23916  |
| C                                    | 1.91282  | 0.50764  | 1.85357  |
| H                                    | 2.90008  | 0.63017  | 2.2812   |
| C                                    | -1.44515 | 3.52255  | 0.05118  |
| H                                    | -1.52955 | 4.59804  | -0.05194 |

|   |          |          |          |
|---|----------|----------|----------|
| C | -4.19026 | -0.2789  | -1.22035 |
| H | -5.13197 | -0.40617 | -1.74127 |
| C | -0.99032 | -3.27202 | 0.89161  |
| H | -0.93748 | -4.34071 | 1.06421  |
| C | 0.8175   | 3.835    | 1.07254  |
| H | 0.85202  | 4.91151  | 0.9973   |
| C | -0.29668 | 3.0229   | 0.63437  |
| C | 0.31486  | -1.06675 | -1.88899 |
| H | -0.11045 | -2.03272 | -1.57515 |
| O | 0.32004  | -0.99533 | -3.2872  |
| C | 1.79307  | -0.98914 | -1.51054 |
| C | 2.56065  | -2.14763 | -1.35894 |
| C | 2.3774   | 0.26795  | -1.31649 |
| C | 3.89466  | -2.04586 | -0.96309 |
| H | 2.1142   | -3.1224  | -1.51923 |
| C | 3.70176  | 0.3752   | -0.90231 |
| H | 1.78317  | 1.16562  | -1.41615 |
| C | 4.46474  | -0.79228 | -0.71889 |
| H | 4.48895  | -2.94355 | -0.81435 |
| O | 4.17969  | 1.6422   | -0.56976 |
| O | 5.77425  | -0.6447  | -0.26556 |
| H | 6.21514  | -1.51066 | -0.17427 |
| C | 5.38517  | 2.1129   | -1.26124 |
| H | 5.51762  | 3.14177  | -0.92742 |
| H | 6.2488   | 1.50424  | -0.9895  |
| H | 5.23106  | 2.09001  | -2.34588 |

**<sup>4</sup>INT-O<sub>A</sub>**

|    |          |          |          |
|----|----------|----------|----------|
| Fe | -1.15436 | 0.10177  | 0.33494  |
| O  | -0.46012 | 0.0894   | -1.37321 |
| S  | -2.00052 | 0.30621  | 2.56911  |
| H  | -2.44363 | 1.61151  | 2.47897  |
| N  | -2.54891 | 1.37803  | -0.36535 |
| C  | -3.65433 | 3.28133  | -1.09714 |
| C  | -4.44441 | 2.21279  | -1.41308 |
| H  | -3.83647 | 4.32945  | -1.282   |
| H  | -5.4036  | 2.21026  | -1.90898 |
| N  | -2.33739 | -1.47362 | -0.06405 |
| C  | -3.56558 | -1.42455 | -0.69869 |
| C  | -4.10085 | -2.76074 | -0.84296 |
| C  | -3.19338 | -3.61744 | -0.28245 |
| H  | -5.04615 | -2.99644 | -1.30854 |
| H  | -3.24834 | -4.69252 | -0.19864 |
| N  | 0.19393  | -1.15545 | 1.15959  |
| C  | 0.09122  | -2.5377  | 1.29962  |
| C  | 1.40921  | -0.80951 | 1.72719  |
| C  | 1.26838  | -3.05677 | 1.96023  |

|                                       |          |          |          |
|---------------------------------------|----------|----------|----------|
| C                                     | 2.08396  | -1.99173 | 2.21738  |
| H                                     | 1.43326  | -4.09926 | 2.18849  |
| H                                     | 3.05177  | -1.9862  | 2.69564  |
| N                                     | -0.0099  | 1.67639  | 0.85418  |
| C                                     | 1.80336  | 2.96418  | 1.52911  |
| H                                     | 2.78769  | 3.18706  | 1.9098   |
| C                                     | 1.25608  | 1.62841  | 1.42387  |
| C                                     | -2.47107 | 2.75114  | -0.44947 |
| C                                     | -3.74723 | 1.02516  | -0.96017 |
| C                                     | -2.09837 | -2.80808 | 0.20317  |
| C                                     | 1.91324  | 0.47831  | 1.81936  |
| H                                     | 2.90813  | 0.5963   | 2.23271  |
| C                                     | -1.40358 | 3.51781  | 0.00405  |
| H                                     | -1.46645 | 4.59146  | -0.13724 |
| C                                     | -4.21589 | -0.26935 | -1.11066 |
| H                                     | -5.17943 | -0.39318 | -1.59363 |
| C                                     | -0.96988 | -3.30106 | 0.84977  |
| H                                     | -0.91711 | -4.3727  | 1.00957  |
| C                                     | 0.86674  | 3.82311  | 1.03202  |
| H                                     | 0.92313  | 4.89756  | 0.94176  |
| C                                     | -0.26108 | 3.02258  | 0.60271  |
| C                                     | 0.23955  | -1.00517 | -1.91474 |
| H                                     | -0.18499 | -1.96622 | -1.5787  |
| O                                     | 0.23513  | -0.99322 | -3.32334 |
| C                                     | 1.72721  | -0.95492 | -1.55062 |
| C                                     | 2.47834  | -2.12321 | -1.39241 |
| C                                     | 2.33044  | 0.29174  | -1.35096 |
| C                                     | 3.8103   | -2.0435  | -0.98197 |
| H                                     | 2.0186   | -3.09115 | -1.55799 |
| C                                     | 3.65116  | 0.37872  | -0.92051 |
| H                                     | 1.74698  | 1.19573  | -1.45622 |
| C                                     | 4.3954   | -0.79957 | -0.72792 |
| H                                     | 4.38909  | -2.95052 | -0.82756 |
| O                                     | 4.14848  | 1.63814  | -0.57946 |
| O                                     | 5.70174  | -0.67083 | -0.25554 |
| H                                     | 6.13114  | -1.54324 | -0.17098 |
| C                                     | 5.35888  | 2.09163  | -1.27299 |
| H                                     | 5.51469  | 3.11461  | -0.93077 |
| H                                     | 6.21177  | 1.46329  | -1.0115  |
| H                                     | 5.19864  | 2.08179  | -2.35695 |
| <b><sup>2</sup>TS-def<sub>A</sub></b> |          |          |          |
| Fe                                    | 1.18824  | 0.1024   | -0.33462 |
| O                                     | 0.45626  | 0.10537  | 1.40322  |
| S                                     | 2.2767   | 0.2652   | -2.43072 |
| H                                     | 2.32116  | 1.64343  | -2.50709 |
| N                                     | 2.60308  | 1.36176  | 0.34599  |

|   |          |          |          |
|---|----------|----------|----------|
| C | 3.74663  | 3.25858  | 1.04948  |
| C | 4.54422  | 2.18446  | 1.31977  |
| H | 3.94237  | 4.30368  | 1.23707  |
| H | 5.5244   | 2.1735   | 1.77234  |
| N | 2.37736  | -1.47579 | 0.01362  |
| C | 3.63442  | -1.43986 | 0.59668  |
| C | 4.18105  | -2.77708 | 0.68085  |
| C | 3.25654  | -3.62413 | 0.13911  |
| H | 5.1476   | -3.01776 | 1.09731  |
| H | 3.31458  | -4.69619 | 0.02525  |
| N | -0.19365 | -1.15146 | -1.1008  |
| C | -0.11633 | -2.52712 | -1.23408 |
| C | -1.41741 | -0.78868 | -1.63229 |
| C | -1.32417 | -3.03872 | -1.8402  |
| C | -2.13153 | -1.9618  | -2.08372 |
| H | -1.51466 | -4.08141 | -2.04568 |
| H | -3.11794 | -1.94483 | -2.52155 |
| N | 0.02423  | 1.69578  | -0.76661 |
| C | -1.80862 | 2.98654  | -1.37036 |
| H | -2.80376 | 3.2094   | -1.72033 |
| C | -1.24427 | 1.65487  | -1.31692 |
| C | 2.53121  | 2.74418  | 0.45373  |
| C | 3.82564  | 1.00254  | 0.88848  |
| C | 2.13239  | -2.81446 | -0.27396 |
| C | -1.90496 | 0.50742  | -1.72537 |
| H | -2.90587 | 0.63407  | -2.12125 |
| C | 1.44417  | 3.51262  | 0.07869  |
| H | 1.50989  | 4.58294  | 0.24206  |
| C | 4.29352  | -0.29448 | 1.01513  |
| H | 5.27094  | -0.42556 | 1.46672  |
| C | 0.9722   | -3.29981 | -0.85185 |
| H | 0.907    | -4.36981 | -1.0171  |
| C | -0.86951 | 3.83546  | -0.8553  |
| H | -0.93079 | 4.90543  | -0.72493 |
| C | 0.26999  | 3.0242   | -0.48096 |
| C | 0.03786  | -0.99465 | 2.06828  |
| H | 0.13007  | -1.9392  | 1.51251  |
| O | -0.07533 | -1.01702 | 3.33786  |
| C | -2.03809 | -0.94627 | 1.66171  |
| C | -2.75819 | -2.12108 | 1.56347  |
| C | -2.53003 | 0.30034  | 1.32262  |
| C | -4.05967 | -2.03717 | 1.03897  |
| H | -2.34071 | -3.07534 | 1.86286  |
| C | -3.82123 | 0.37509  | 0.78755  |
| H | -1.92108 | 1.19046  | 1.40413  |
| C | -4.57992 | -0.8029  | 0.63936  |

|                                       |          |          |          |
|---------------------------------------|----------|----------|----------|
| H                                     | -4.65874 | -2.93727 | 0.92165  |
| O                                     | -4.26881 | 1.60737  | 0.30543  |
| O                                     | -5.84693 | -0.67749 | 0.06018  |
| H                                     | -6.30054 | -1.54078 | 0.0249   |
| C                                     | -5.49285 | 2.15209  | 0.90502  |
| H                                     | -5.6161  | 3.13696  | 0.45464  |
| H                                     | -6.34777 | 1.51366  | 0.67691  |
| H                                     | -5.36846 | 2.25009  | 1.98898  |
| <b><sup>4</sup>TS-def<sub>A</sub></b> |          |          |          |
| Fe                                    | 1.19238  | 0.11169  | -0.31599 |
| O                                     | 0.499    | -0.02588 | 1.40104  |
| S                                     | 2.09485  | 0.31916  | -2.47778 |
| H                                     | 2.51964  | 1.62386  | -2.32775 |
| N                                     | 2.68439  | 1.25185  | 0.3729   |
| C                                     | 3.89971  | 3.04053  | 1.19537  |
| C                                     | 4.71119  | 1.94153  | 1.2511   |
| H                                     | 4.12127  | 4.0539   | 1.4951   |
| H                                     | 5.72701  | 1.8753   | 1.61084  |
| N                                     | 2.31134  | -1.53618 | -0.05748 |
| C                                     | 3.63267  | -1.5756  | 0.36895  |
| C                                     | 4.08443  | -2.94626 | 0.41745  |
| C                                     | 3.03653  | -3.73297 | 0.02717  |
| H                                     | 5.07484  | -3.25065 | 0.72095  |
| H                                     | 3.00063  | -4.8087  | -0.05865 |
| N                                     | -0.24632 | -1.01833 | -1.12939 |
| C                                     | -0.28861 | -2.40544 | -1.19781 |
| C                                     | -1.41813 | -0.56266 | -1.72223 |
| C                                     | -1.52049 | -2.82133 | -1.82396 |
| C                                     | -2.2093  | -1.68761 | -2.15639 |
| H                                     | -1.803   | -3.85061 | -1.98711 |
| H                                     | -3.17364 | -1.60148 | -2.63354 |
| N                                     | 0.10382  | 1.75827  | -0.65028 |
| C                                     | -1.6218  | 3.17968  | -1.25271 |
| H                                     | -2.57578 | 3.48427  | -1.65294 |
| C                                     | -1.12688 | 1.82387  | -1.29109 |
| C                                     | 2.63547  | 2.61208  | 0.64336  |
| C                                     | 3.94826  | 0.82089  | 0.75313  |
| C                                     | 1.93492  | -2.85302 | -0.28494 |
| C                                     | -1.82133 | 0.75473  | -1.81989 |
| H                                     | -2.79001 | 0.95555  | -2.25896 |
| C                                     | 1.56319  | 3.44827  | 0.39161  |
| H                                     | 1.66059  | 4.49246  | 0.66389  |
| C                                     | 4.40088  | -0.4849  | 0.72931  |
| H                                     | 5.41763  | -0.67117 | 1.05445  |
| C                                     | 0.7115   | -3.26574 | -0.78148 |
| H                                     | 0.54553  | -4.32986 | -0.90003 |

|                                        |          |          |          |
|----------------------------------------|----------|----------|----------|
| C                                      | -0.69128 | 3.93126  | -0.59156 |
| H                                      | -0.71918 | 4.98635  | -0.36386 |
| C                                      | 0.39379  | 3.04773  | -0.22701 |
| C                                      | 0.04112  | -1.0822  | 2.12226  |
| H                                      | 0.09326  | -2.04465 | 1.59734  |
| O                                      | -0.07003 | -1.03332 | 3.38314  |
| C                                      | -2.0632  | -0.98345 | 1.67337  |
| C                                      | -2.81985 | -2.13809 | 1.63169  |
| C                                      | -2.50675 | 0.26315  | 1.27678  |
| C                                      | -4.11798 | -2.031   | 1.10425  |
| H                                      | -2.43714 | -3.09078 | 1.97855  |
| C                                      | -3.79565 | 0.35813  | 0.73924  |
| H                                      | -1.87066 | 1.13683  | 1.3192   |
| C                                      | -4.59464 | -0.79849 | 0.64732  |
| H                                      | -4.75005 | -2.91294 | 1.03107  |
| O                                      | -4.2004  | 1.58352  | 0.20761  |
| O                                      | -5.85899 | -0.65634 | 0.06779  |
| H                                      | -6.3353  | -1.50792 | 0.05649  |
| C                                      | -5.41101 | 2.19003  | 0.77428  |
| H                                      | -5.49845 | 3.1595   | 0.28399  |
| H                                      | -6.28422 | 1.57081  | 0.56413  |
| H                                      | -5.29206 | 2.32751  | 1.85462  |
| <b><sup>2</sup>INT-def<sub>A</sub></b> |          |          |          |
| Fe                                     | -1.04006 | 0.03712  | -0.3678  |
| O                                      | -0.36694 | -0.03377 | 1.43864  |
| S                                      | -1.76407 | 0.20625  | -2.58729 |
| H                                      | -0.52573 | 0.16886  | -3.197   |
| N                                      | 0.38607  | -1.29855 | -0.8965  |
| C                                      | 2.33824  | -2.28701 | -1.66561 |
| C                                      | 1.4905   | -3.29791 | -1.29956 |
| H                                      | 3.34569  | -2.35251 | -2.04706 |
| H                                      | 1.65961  | -4.36347 | -1.3445  |
| N                                      | -2.34852 | -1.44013 | -0.01882 |
| C                                      | -2.06994 | -2.79804 | -0.04221 |
| C                                      | -3.26817 | -3.55122 | 0.2625   |
| C                                      | -4.27537 | -2.64338 | 0.43669  |
| H                                      | -3.31967 | -4.62851 | 0.31411  |
| H                                      | -5.31312 | -2.82889 | 0.66897  |
| N                                      | -2.46154 | 1.36278  | 0.08206  |
| C                                      | -3.80591 | 1.12056  | 0.33091  |
| C                                      | -2.29272 | 2.73134  | 0.20308  |
| C                                      | -4.48982 | 2.36566  | 0.60299  |
| C                                      | -3.5541  | 3.35746  | 0.54407  |
| H                                      | -5.54214 | 2.44915  | 0.8286   |
| H                                      | -3.6889  | 4.41717  | 0.70045  |
| N                                      | 0.27309  | 1.51372  | -0.75162 |

|                                        |          |          |          |
|----------------------------------------|----------|----------|----------|
| C                                      | 1.23348  | 3.61994  | -0.91589 |
| H                                      | 1.32494  | 4.69245  | -0.83363 |
| C                                      | 0.06558  | 2.86169  | -0.5204  |
| C                                      | 1.64635  | -1.04576 | -1.40424 |
| C                                      | 0.2732   | -2.6765  | -0.82657 |
| C                                      | -3.69325 | -1.33126 | 0.26355  |
| C                                      | -1.1135  | 3.41694  | -0.04249 |
| H                                      | -1.13128 | 4.49295  | 0.09425  |
| C                                      | 2.18643  | 0.22177  | -1.59624 |
| H                                      | 3.19392  | 0.2786   | -1.98982 |
| C                                      | -0.8564  | -3.3639  | -0.40042 |
| H                                      | -0.79867 | -4.44751 | -0.39288 |
| C                                      | -4.38436 | -0.13164 | 0.38441  |
| H                                      | -5.44666 | -0.18571 | 0.59484  |
| C                                      | 2.14645  | 2.72503  | -1.39732 |
| H                                      | 3.14033  | 2.91326  | -1.77114 |
| C                                      | 1.55333  | 1.41081  | -1.28006 |
| C                                      | -1.06788 | 0.001    | 2.56662  |
| H                                      | -0.4056  | -0.06801 | 3.4489   |
| O                                      | -2.29744 | 0.09661  | 2.71149  |
| C                                      | 3.52969  | 1.9173   | 1.588    |
| C                                      | 2.94788  | 0.68493  | 1.83614  |
| C                                      | 3.57816  | -0.4187  | 1.24818  |
| C                                      | 4.70605  | -0.24375 | 0.41819  |
| C                                      | 5.2461   | 1.02055  | 0.20116  |
| C                                      | 4.6494   | 2.14395  | 0.81043  |
| H                                      | 2.02625  | 0.57828  | 2.39241  |
| H                                      | 6.12114  | 1.11557  | -0.43132 |
| H                                      | 5.05982  | 3.13566  | 0.65984  |
| O                                      | 5.25178  | -1.35848 | -0.20739 |
| H                                      | 4.76831  | -2.15101 | 0.11376  |
| O                                      | 3.19856  | -1.74771 | 1.37019  |
| C                                      | 2.00863  | -2.07442 | 2.15096  |
| H                                      | 1.14816  | -1.51257 | 1.7818   |
| H                                      | 1.86379  | -3.14399 | 2.00834  |
| H                                      | 2.18661  | -1.85547 | 3.21001  |
| <b><sup>4</sup>INT-def<sub>A</sub></b> |          |          |          |
| Fe                                     | -1.03501 | -0.03688 | 0.36896  |
| O                                      | -0.3653  | 0.0317   | -1.43945 |
| S                                      | -1.75767 | -0.20023 | 2.58875  |
| H                                      | -0.51938 | -0.15738 | 3.19821  |
| N                                      | 0.38549  | 1.30627  | 0.89371  |
| C                                      | 2.33001  | 2.30581  | 1.66749  |
| C                                      | 1.47893  | 3.31188  | 1.29592  |
| H                                      | 3.33497  | 2.37709  | 2.05442  |
| H                                      | 1.64267  | 4.37834  | 1.33951  |

|   |          |          |          |
|---|----------|----------|----------|
| N | -2.34997 | 1.43336  | 0.01583  |
| C | -2.077   | 2.79225  | 0.03382  |
| C | -3.27843 | 3.53938  | -0.27345 |
| C | -4.28203 | 2.62682  | -0.44357 |
| H | -3.33434 | 4.61625  | -0.32921 |
| H | -5.32062 | 2.80726  | -0.67613 |
| N | -2.45075 | -1.37007 | -0.07706 |
| C | -3.79613 | -1.13482 | -0.32507 |
| C | -2.27546 | -2.73818 | -0.19472 |
| C | -4.47464 | -2.38376 | -0.59322 |
| C | -3.53424 | -3.37108 | -0.53283 |
| H | -5.52679 | -2.47271 | -0.81754 |
| H | -3.66428 | -4.43181 | -0.68637 |
| N | 0.28551  | -1.50621 | 0.75566  |
| C | 1.25476  | -3.60778 | 0.92597  |
| H | 1.35097  | -4.68007 | 0.84628  |
| C | 0.08406  | -2.85544 | 0.52756  |
| C | 1.64516  | 1.06062  | 1.40622  |
| C | 0.26613  | 2.68364  | 0.82035  |
| C | -3.69456 | 1.31771  | -0.26561 |
| C | -1.09278 | -3.41739 | 0.05151  |
| H | -1.10554 | -4.49384 | -0.0824  |
| C | 2.19112  | -0.20393 | 1.60201  |
| H | 3.19716  | -0.25506 | 1.99998  |
| C | -0.86582 | 3.36459  | 0.39047  |
| H | -0.81288 | 4.44842  | 0.37942  |
| C | -4.38036 | 0.11484  | -0.38186 |
| H | -5.44306 | 0.16344  | -0.59163 |
| C | 2.1632   | -2.7078  | 1.40668  |
| H | 3.15724  | -2.89102 | 1.78255  |
| C | 1.56448  | -1.39646 | 1.28588  |
| C | -1.06739 | -0.00911 | -2.56644 |
| H | -0.4064  | 0.0602   | -3.44977 |
| O | -2.29669 | -0.11003 | -2.70999 |
| C | 3.5167   | -1.91422 | -1.60591 |
| C | 2.93484  | -0.68099 | -1.84953 |
| C | 3.56195  | 0.41971  | -1.25307 |
| C | 4.68654  | 0.24072  | -0.41923 |
| C | 5.22743  | -1.02442 | -0.20779 |
| C | 4.6344   | -2.1444  | -0.8261  |
| H | 2.01518  | -0.57192 | -2.4084  |
| H | 6.10027  | -1.12216 | 0.4273   |
| H | 5.04512  | -3.13664 | -0.68009 |
| O | 5.22938  | 1.35214  | 0.21387  |
| H | 4.74515  | 2.14593  | -0.10323 |
| O | 3.18323  | 1.74929  | -1.36959 |



|                                      |          |          |          |
|--------------------------------------|----------|----------|----------|
| C                                    | 1.99766  | 2.08103  | -2.15499 |
| H                                    | 1.13493  | 1.51936  | -1.79104 |
| H                                    | 1.85441  | 3.15041  | -2.00948 |
| H                                    | 2.18034  | 1.86514  | -3.21387 |
| <b><sup>2</sup>P-def<sub>A</sub></b> |          |          |          |
| Fe                                   | 1.44137  | -0.01349 | -0.45411 |
| O                                    | 0.20032  | -0.01439 | 1.25114  |
| S                                    | 2.74839  | -0.03996 | -2.30555 |
| H                                    | 2.21381  | 1.07979  | -2.91422 |
| N                                    | 3.02836  | -0.33817 | 0.73764  |
| C                                    | 4.98549  | -0.00277 | 1.94029  |
| C                                    | 4.75676  | -1.34942 | 1.91259  |
| H                                    | 5.80016  | 0.52913  | 2.40909  |
| H                                    | 5.34899  | -2.1392  | 2.35051  |
| N                                    | 1.1571   | -1.99799 | -0.56633 |
| C                                    | 1.89892  | -2.9979  | 0.04059  |
| C                                    | 1.38902  | -4.2976  | -0.34829 |
| C                                    | 0.3502   | -4.07884 | -1.20602 |
| H                                    | 1.79285  | -5.23979 | -0.00859 |
| H                                    | -0.2709  | -4.80647 | -1.7072  |
| N                                    | -0.21657 | 0.31331  | -1.54491 |
| C                                    | -0.95747 | -0.65631 | -2.20413 |
| C                                    | -0.79145 | 1.53448  | -1.86764 |
| C                                    | -2.01725 | -0.02831 | -2.96211 |
| C                                    | -1.92037 | 1.3265   | -2.74647 |
| H                                    | -2.72316 | -0.55745 | -3.58586 |
| H                                    | -2.53066 | 2.11545  | -3.16145 |
| N                                    | 1.64394  | 1.97128  | -0.219   |
| C                                    | 1.3452   | 4.27141  | -0.34034 |
| H                                    | 0.88257  | 5.21453  | -0.591   |
| C                                    | 0.80833  | 2.97437  | -0.69551 |
| C                                    | 3.90721  | 0.62955  | 1.20832  |
| C                                    | 3.54309  | -1.56    | 1.15219  |
| C                                    | 0.20422  | -2.64263 | -1.34147 |
| C                                    | -0.33469 | 2.77451  | -1.4478  |
| H                                    | -0.88933 | 3.64991  | -1.76638 |
| C                                    | 3.75546  | 1.9971   | 1.05747  |
| H                                    | 4.51347  | 2.63535  | 1.49767  |
| C                                    | 3.00089  | -2.79825 | 0.85596  |
| H                                    | 3.49947  | -3.67512 | 1.25332  |
| C                                    | -0.76337 | -2.02605 | -2.11262 |
| H                                    | -1.43734 | -2.66381 | -2.67375 |
| C                                    | 2.51195  | 4.0513   | 0.33455  |
| H                                    | 3.1935   | 4.77864  | 0.75032  |
| C                                    | 2.69648  | 2.61623  | 0.41255  |
| C                                    | 0.53828  | 0.10634  | 2.44408  |

|                                      |          |          |          |
|--------------------------------------|----------|----------|----------|
| H                                    | 1.57376  | 0.20883  | 2.76026  |
| O                                    | -0.32478 | 0.12312  | 3.45917  |
| H                                    | -1.29787 | 0.03177  | 3.15953  |
| C                                    | -5.3873  | 0.14314  | 1.22506  |
| C                                    | -5.32943 | -0.05767 | 2.6248   |
| C                                    | -4.012   | -0.19863 | 2.99641  |
| C                                    | -2.91232 | -0.13192 | 2.37773  |
| C                                    | -2.91512 | 0.02816  | 0.97155  |
| C                                    | -4.20146 | 0.18944  | 0.42438  |
| H                                    | -6.22708 | -0.114   | 3.22143  |
| H                                    | -2.01029 | 0.07346  | 0.37858  |
| O                                    | -6.64722 | 0.33198  | 0.67982  |
| O                                    | -4.40034 | 0.42035  | -0.9242  |
| H                                    | -3.55614 | 0.48351  | -1.42643 |
| C                                    | -7.08516 | -0.6006  | -0.37143 |
| H                                    | -8.10364 | -0.29396 | -0.60587 |
| H                                    | -6.44064 | -0.51544 | -1.24569 |
| H                                    | -7.07981 | -1.62624 | 0.01395  |
| <b><sup>4</sup>P-def<sub>A</sub></b> |          |          |          |
| Fe                                   | 1.4869   | 0.20853  | -0.44496 |
| O                                    | 0.19143  | -0.50748 | 1.54163  |
| S                                    | 2.73718  | 0.79419  | -2.46591 |
| H                                    | 2.62638  | 2.16178  | -2.29993 |
| N                                    | 2.95233  | -0.94186 | 0.32327  |
| C                                    | 4.94256  | -1.60945 | 1.31132  |
| C                                    | 4.38848  | -2.71738 | 0.73347  |
| H                                    | 5.8679   | -1.53313 | 1.86259  |
| H                                    | 4.77202  | -3.72666 | 0.71564  |
| N                                    | 0.65602  | -1.42691 | -1.27024 |
| C                                    | 1.15444  | -2.72218 | -1.2501  |
| C                                    | 0.3024   | -3.58836 | -2.03406 |
| C                                    | -0.70275 | -2.81334 | -2.54092 |
| H                                    | 0.46945  | -4.6459  | -2.17435 |
| H                                    | -1.52353 | -3.11139 | -3.17603 |
| N                                    | -0.13549 | 1.28489  | -0.96888 |
| C                                    | -1.14379 | 0.88254  | -1.83516 |
| C                                    | -0.38923 | 2.61569  | -0.66373 |
| C                                    | -2.04563 | 1.98501  | -2.07825 |
| C                                    | -1.5857  | 3.05262  | -1.34518 |
| H                                    | -2.90475 | 1.94219  | -2.73128 |
| H                                    | -1.99456 | 4.05088  | -1.28975 |
| N                                    | 2.16709  | 1.7727   | 0.6167   |
| C                                    | 2.44372  | 3.89811  | 1.50457  |
| H                                    | 2.22274  | 4.92998  | 1.7339   |
| C                                    | 1.59124  | 3.03322  | 0.7196   |
| C                                    | 4.04676  | -0.5024  | 1.05817  |

|   |          |          |          |
|---|----------|----------|----------|
| C | 3.15247  | -2.29987 | 0.10857  |
| C | -0.48477 | -1.46642 | -2.06357 |
| C | 0.40041  | 3.42561  | 0.13624  |
| H | 0.07485  | 4.44743  | 0.29406  |
| C | 4.24416  | 0.78784  | 1.51447  |
| H | 5.14492  | 0.98788  | 2.08327  |
| C | 2.3087   | -3.13334 | -0.60424 |
| H | 2.58296  | -4.17896 | -0.68308 |
| C | -1.30953 | -0.39368 | -2.34511 |
| H | -2.15994 | -0.56898 | -2.99379 |
| C | 3.53706  | 3.16345  | 1.86924  |
| H | 4.3868   | 3.47382  | 2.45879  |
| C | 3.36121  | 1.83669  | 1.32188  |
| C | 0.451    | -1.53122 | 2.19064  |
| H | 1.46473  | -1.86904 | 2.40211  |
| O | -0.46563 | -2.36834 | 2.70562  |
| H | -1.41466 | -2.09778 | 2.47834  |
| C | -5.3877  | -0.29522 | 1.08331  |
| C | -5.43951 | -1.50588 | 1.81346  |
| C | -4.15432 | -1.94742 | 2.04156  |
| C | -3.01757 | -1.46702 | 1.77867  |
| C | -2.90001 | -0.27824 | 1.02707  |
| C | -4.14236 | 0.29934  | 0.70433  |
| H | -6.38236 | -1.95698 | 2.08345  |
| H | -1.95025 | 0.17336  | 0.77088  |
| O | -6.60419 | 0.30515  | 0.79392  |
| O | -4.23675 | 1.5      | 0.02032  |
| H | -3.36279 | 1.82656  | -0.28707 |
| C | -6.93008 | 0.54289  | -0.62043 |
| H | -7.94312 | 0.94291  | -0.60794 |
| H | -6.2339  | 1.25976  | -1.05483 |
| H | -6.90578 | -0.40244 | -1.17425 |

### Path B

#### <sup>2</sup>RC<sub>B</sub>

|    |          |          |          |
|----|----------|----------|----------|
| Fe | -1.31642 | 0.02881  | -0.18858 |
| O  | -0.68951 | 0.07213  | 1.34922  |
| S  | -2.14255 | -0.36556 | -2.52252 |
| H  | -1.0489  | 0.15119  | -3.19038 |
| N  | -0.19252 | 1.57062  | -0.81475 |
| C  | 0.6587   | 3.7156   | -1.05229 |
| C  | 1.59774  | 2.85144  | -1.54111 |
| H  | 0.70185  | 4.79291  | -0.99691 |
| H  | 2.5694   | 3.07556  | -1.95378 |
| N  | 0.07101  | -1.24577 | -0.90232 |
| C  | 1.29722  | -0.92397 | -1.48118 |
| C  | 2.05911  | -2.12841 | -1.72349 |

|   |          |          |          |
|---|----------|----------|----------|
| C | 1.31559  | -3.17409 | -1.26238 |
| H | 3.04629  | -2.14667 | -2.15988 |
| H | 1.56646  | -4.22404 | -1.25921 |
| N | -2.53037 | -1.53006 | 0.17883  |
| C | -2.17918 | -2.86824 | 0.18067  |
| C | -3.85809 | -1.47939 | 0.58453  |
| C | -3.30567 | -3.67291 | 0.59933  |
| C | -4.34516 | -2.81762 | 0.83399  |
| H | -3.29098 | -4.74936 | 0.68107  |
| H | -5.34918 | -3.05352 | 1.15341  |
| N | -2.81371 | 1.29293  | 0.23265  |
| C | -4.84501 | 2.16733  | 0.92401  |
| H | -5.87387 | 2.1834   | 1.25096  |
| C | -4.09623 | 0.96555  | 0.63034  |
| C | -0.45946 | 2.91751  | -0.60413 |
| C | 1.06795  | 1.5168   | -1.38303 |
| C | 0.07821  | -2.6292  | -0.74848 |
| C | -4.59105 | -0.32297 | 0.76957  |
| H | -5.62267 | -0.42952 | 1.08606  |
| C | -1.63496 | 3.42849  | -0.08691 |
| H | -1.71069 | 4.50545  | 0.01298  |
| C | 1.75303  | 0.35586  | -1.71428 |
| H | 2.74636  | 0.46469  | -2.13328 |
| C | -0.95176 | -3.37634 | -0.2168  |
| H | -0.81063 | -4.44936 | -0.15286 |
| C | -4.0015  | 3.2231   | 0.71769  |
| H | -4.20301 | 4.27712  | 0.83642  |
| C | -2.73827 | 2.67346  | 0.27858  |
| C | 6.37939  | -0.20025 | -0.18053 |
| H | 7.09684  | 0.6229   | -0.35989 |
| O | 6.68046  | -1.36768 | -0.49706 |
| C | 5.11204  | 0.20467  | 0.42191  |
| C | 4.13486  | -0.75657 | 0.74177  |
| C | 4.85045  | 1.56381  | 0.68181  |
| C | 2.91789  | -0.37109 | 1.28056  |
| H | 4.33005  | -1.80573 | 0.55607  |
| C | 3.62632  | 1.95603  | 1.2106   |
| H | 5.6075   | 2.30782  | 0.45053  |
| C | 2.63254  | 1.00286  | 1.48905  |
| H | 3.38569  | 2.99709  | 1.38576  |
| O | 1.94263  | -1.34638 | 1.49751  |
| O | 1.43213  | 1.4504   | 1.95168  |
| H | 0.63906  | 0.84521  | 1.76792  |
| C | 1.50742  | -1.56451 | 2.88326  |
| H | 0.63349  | -2.20811 | 2.80678  |
| H | 2.30647  | -2.05632 | 3.44802  |

|                              |          |          |          |
|------------------------------|----------|----------|----------|
| H                            | 1.22903  | -0.62411 | 3.36358  |
| <sup>4</sup> RC <sub>B</sub> |          |          |          |
| Fe                           | -1.31031 | 0.02119  | -0.19628 |
| O                            | -0.69423 | 0.09957  | 1.34673  |
| S                            | -2.13793 | -0.35196 | -2.51246 |
| H                            | -1.05841 | 0.19171  | -3.1818  |
| N                            | -0.18762 | 1.5676   | -0.82155 |
| C                            | 0.65655  | 3.71476  | -1.06552 |
| C                            | 1.60074  | 2.85198  | -1.54658 |
| H                            | 0.69565  | 4.79244  | -1.01434 |
| H                            | 2.57324  | 3.0778   | -1.95636 |
| N                            | 0.08023  | -1.24771 | -0.90051 |
| C                            | 1.30539  | -0.92431 | -1.48155 |
| C                            | 2.06746  | -2.12804 | -1.72678 |
| C                            | 1.32429  | -3.17519 | -1.26848 |
| H                            | 3.05441  | -2.14494 | -2.16378 |
| H                            | 1.57511  | -4.22516 | -1.26876 |
| N                            | -2.51992 | -1.5364  | 0.17958  |
| C                            | -2.16933 | -2.87454 | 0.17756  |
| C                            | -3.84767 | -1.48655 | 0.58626  |
| C                            | -3.29509 | -3.68021 | 0.59542  |
| C                            | -4.33425 | -2.82527 | 0.83337  |
| H                            | -3.28037 | -4.75685 | 0.67459  |
| H                            | -5.33795 | -3.06187 | 1.15331  |
| N                            | -2.81026 | 1.287    | 0.23045  |
| C                            | -4.83965 | 2.15934  | 0.92994  |
| H                            | -5.86656 | 2.17411  | 1.26303  |
| C                            | -4.08969 | 0.95815  | 0.63519  |
| C                            | -0.46054 | 2.91455  | -0.61773 |
| C                            | 1.07452  | 1.51615  | -1.38547 |
| C                            | 0.08712  | -2.63205 | -0.75253 |
| C                            | -4.58162 | -0.3313  | 0.77536  |
| H                            | -5.61213 | -0.44008 | 1.09474  |
| C                            | -1.63823 | 3.42399  | -0.10412 |
| H                            | -1.71771 | 4.50129  | -0.01078 |
| C                            | 1.76169  | 0.35547  | -1.71319 |
| H                            | 2.75577  | 0.46437  | -2.13038 |
| C                            | -0.9417  | -3.38112 | -0.22186 |
| H                            | -0.79982 | -4.4542  | -0.16058 |
| C                            | -3.99994 | 3.21616  | 0.71467  |
| H                            | -4.20299 | 4.27016  | 0.83096  |
| C                            | -2.7377  | 2.66759  | 0.27009  |
| C                            | 6.3615   | -0.2204  | -0.17502 |
| H                            | 7.08596  | 0.59615  | -0.3563  |
| O                            | 6.65161  | -1.3908  | -0.4909  |
| C                            | 5.09852  | 0.19629  | 0.42867  |

|                                     |          |          |          |
|-------------------------------------|----------|----------|----------|
| C                                   | 4.11344  | -0.7561  | 0.75046  |
| C                                   | 4.84866  | 1.55804  | 0.68673  |
| C                                   | 2.90013  | -0.35928 | 1.28922  |
| H                                   | 4.2993   | -1.80711 | 0.56577  |
| C                                   | 3.62813  | 1.96161  | 1.21529  |
| H                                   | 5.61186  | 2.29523  | 0.45383  |
| C                                   | 2.62635  | 1.01731  | 1.49515  |
| H                                   | 3.39647  | 3.00499  | 1.38872  |
| O                                   | 1.91626  | -1.32555 | 1.50806  |
| O                                   | 1.42923  | 1.47538  | 1.95615  |
| H                                   | 0.63268  | 0.87525  | 1.77337  |
| C                                   | 1.48308  | -1.54057 | 2.89495  |
| H                                   | 0.60438  | -2.17789 | 2.82068  |
| H                                   | 2.27999  | -2.03812 | 3.45767  |
| H                                   | 1.21307  | -0.59799 | 3.37594  |
| <b><sup>2</sup>TS-H<sub>B</sub></b> |          |          |          |
| Fe                                  | 1.27439  | -0.01992 | 0.28721  |
| O                                   | 0.63834  | 0.14601  | -1.37355 |
| S                                   | 2.2381   | 0.02866  | 2.418    |
| H                                   | 1.24902  | 0.76486  | 3.03918  |
| N                                   | -0.52397 | 0.32095  | 1.11974  |
| C                                   | -2.434   | 1.36294  | 1.91262  |
| C                                   | -2.60222 | 0.01848  | 2.09615  |
| H                                   | -3.1218  | 2.16142  | 2.14473  |
| H                                   | -3.45743 | -0.5011  | 2.50076  |
| N                                   | 0.94516  | -1.98365 | 0.37355  |
| C                                   | -0.16235 | -2.62273 | 0.91986  |
| C                                   | -0.01864 | -4.05212 | 0.77427  |
| C                                   | 1.17863  | -4.27908 | 0.15467  |
| H                                   | -0.74782 | -4.77389 | 1.11047  |
| H                                   | 1.6286   | -5.22458 | -0.10908 |
| N                                   | 3.13354  | -0.3569  | -0.36478 |
| C                                   | 3.69528  | -1.5811  | -0.68682 |
| C                                   | 4.09979  | 0.60279  | -0.6362  |
| C                                   | 5.04956  | -1.38709 | -1.15177 |
| C                                   | 5.30137  | -0.04408 | -1.11146 |
| H                                   | 5.70784  | -2.18439 | -1.46301 |
| H                                   | 6.20505  | 0.47763  | -1.38889 |
| N                                   | 1.58673  | 1.9749   | 0.19171  |
| C                                   | 2.56567  | 4.03948  | -0.17307 |
| H                                   | 3.32588  | 4.76023  | -0.43451 |
| C                                   | 2.75782  | 2.60506  | -0.19415 |
| C                                   | -1.13728 | 1.55585  | 1.30746  |
| C                                   | -1.41686 | -0.63272 | 1.59009  |
| C                                   | 1.79343  | -2.99164 | -0.07375 |
| C                                   | 3.93363  | 1.97271  | -0.55168 |

|                                     |          |          |          |
|-------------------------------------|----------|----------|----------|
| H                                   | 4.77943  | 2.59689  | -0.81572 |
| C                                   | -0.59888 | 2.7863   | 0.97889  |
| H                                   | -1.20658 | 3.66454  | 1.16171  |
| C                                   | -1.24801 | -2.00201 | 1.50598  |
| H                                   | -2.0421  | -2.63107 | 1.89016  |
| C                                   | 3.06512  | -2.80874 | -0.58164 |
| H                                   | 3.62152  | -3.68961 | -0.87981 |
| C                                   | 1.27954  | 4.26837  | 0.22558  |
| H                                   | 0.77634  | 5.21409  | 0.36025  |
| C                                   | 0.67213  | 2.97736  | 0.46911  |
| C                                   | -6.29299 | -0.19224 | 0.09932  |
| H                                   | -7.0237  | 0.62749  | 0.22988  |
| O                                   | -6.56801 | -1.34156 | 0.49241  |
| C                                   | -5.03402 | 0.19424  | -0.53622 |
| C                                   | -4.04762 | -0.76424 | -0.79381 |
| C                                   | -4.78472 | 1.5388   | -0.87538 |
| C                                   | -2.83341 | -0.40703 | -1.37143 |
| H                                   | -4.22846 | -1.80402 | -0.54983 |
| C                                   | -3.56217 | 1.90352  | -1.4161  |
| H                                   | -5.54675 | 2.29019  | -0.69054 |
| C                                   | -2.54301 | 0.95741  | -1.65468 |
| H                                   | -3.32866 | 2.93329  | -1.65651 |
| O                                   | -1.98051 | -1.50126 | -1.57451 |
| O                                   | -1.37805 | 1.43821  | -2.16087 |
| C                                   | -0.87939 | -1.50282 | -2.43941 |
| H                                   | 0.07192  | -0.85451 | -1.88088 |
| H                                   | -0.53957 | -2.5293  | -2.551   |
| H                                   | -1.02811 | -0.94499 | -3.36615 |
| H                                   | -0.5012  | 0.99398  | -1.83449 |
| <b><sup>4</sup>TS-H<sub>B</sub></b> |          |          |          |
| Fe                                  | 1.30264  | 0.04551  | 0.26683  |
| O                                   | 0.61255  | 0.06957  | -1.38644 |
| S                                   | 2.30842  | -0.26077 | 2.40007  |
| H                                   | 1.20024  | -0.76052 | 3.05517  |
| N                                   | -0.50744 | 0.24688  | 1.13319  |
| C                                   | -2.4552  | 1.17642  | 1.97781  |
| C                                   | -2.58486 | -0.18204 | 2.07225  |
| H                                   | -3.16908 | 1.93727  | 2.25293  |
| H                                   | -3.42762 | -0.75059 | 2.43486  |
| N                                   | 1.06203  | -1.98459 | 0.3387   |
| C                                   | -0.03372 | -2.69061 | 0.81413  |
| C                                   | 0.17444  | -4.10888 | 0.61949  |
| C                                   | 1.39881  | -4.25764 | 0.02937  |
| H                                   | -0.53147 | -4.87522 | 0.90267  |
| H                                   | 1.89687  | -5.17093 | -0.26009 |
| N                                   | 3.16839  | -0.19652 | -0.38655 |

|                               |          |          |          |
|-------------------------------|----------|----------|----------|
| C                             | 3.78709  | -1.39781 | -0.71981 |
| C                             | 4.09183  | 0.80112  | -0.6579  |
| C                             | 5.12998  | -1.13808 | -1.18725 |
| C                             | 5.32093  | 0.21429  | -1.14099 |
| H                             | 5.8234   | -1.90203 | -1.50574 |
| H                             | 6.19963  | 0.77724  | -1.41797 |
| N                             | 1.52541  | 2.01795  | 0.22744  |
| C                             | 2.39014  | 4.14847  | -0.09399 |
| H                             | 3.10636  | 4.91386  | -0.35275 |
| C                             | 2.64924  | 2.72475  | -0.16683 |
| C                             | -1.16245 | 1.43967  | 1.39109  |
| C                             | -1.37571 | -0.76204 | 1.53541  |
| C                             | 1.95561  | -2.93127 | -0.13343 |
| C                             | 3.85196  | 2.161    | -0.5538  |
| H                             | 4.66004  | 2.83378  | -0.81796 |
| C                             | -0.66749 | 2.7048   | 1.11003  |
| H                             | -1.30422 | 3.55058  | 1.34297  |
| C                             | -1.15882 | -2.12154 | 1.38407  |
| H                             | -1.94691 | -2.78946 | 1.71203  |
| C                             | 3.21767  | -2.65475 | -0.63464 |
| H                             | 3.82132  | -3.49608 | -0.95668 |
| C                             | 1.11045  | 4.29984  | 0.35335  |
| H                             | 0.567    | 5.21432  | 0.53789  |
| C                             | 0.5756   | 2.97112  | 0.57102  |
| C                             | -6.38644 | -0.1386  | 0.06957  |
| H                             | -7.09726 | 0.69825  | 0.20402  |
| O                             | -6.70214 | -1.28827 | 0.4321   |
| C                             | -5.10655 | 0.2275   | -0.5322  |
| C                             | -4.13795 | -0.75074 | -0.79079 |
| C                             | -4.81596 | 1.57045  | -0.84001 |
| C                             | -2.90191 | -0.41736 | -1.33304 |
| H                             | -4.3514  | -1.78969 | -0.57008 |
| C                             | -3.57531 | 1.91045  | -1.35559 |
| H                             | -5.56104 | 2.33882  | -0.65523 |
| C                             | -2.57461 | 0.94364  | -1.59374 |
| H                             | -3.31231 | 2.93738  | -1.57773 |
| O                             | -2.06211 | -1.52923 | -1.50641 |
| O                             | -1.39491 | 1.41217  | -2.07515 |
| C                             | -0.96891 | -1.57223 | -2.38714 |
| H                             | 0.04944  | -0.88269 | -1.8254  |
| H                             | -0.63902 | -2.60468 | -2.4685  |
| H                             | -1.1174  | -1.03699 | -3.32701 |
| H                             | -0.5227  | 0.92704  | -1.78702 |
| <sup>2</sup> INT <sub>B</sub> |          |          |          |
| Fe                            | -1.69815 | 0.00183  | -0.14549 |
| O                             | -0.95741 | -0.26239 | 1.49105  |



|   |          |          |          |
|---|----------|----------|----------|
| S | -2.79559 | 0.29489  | -2.16896 |
| H | -2.5714  | 1.65118  | -2.29856 |
| N | -0.93849 | 1.85026  | -0.29861 |
| C | -0.5562  | 4.11426  | 0.00202  |
| C | 0.47963  | 3.62495  | -0.74398 |
| H | -0.72083 | 5.12698  | 0.33879  |
| H | 1.33629  | 4.15213  | -1.13611 |
| N | -0.08083 | -0.74292 | -1.03539 |
| C | 0.97774  | -0.02649 | -1.57948 |
| C | 1.94163  | -0.94171 | -2.15173 |
| C | 1.46164  | -2.20576 | -1.95494 |
| H | 2.85474  | -0.62439 | -2.63001 |
| H | 1.90454  | -3.14487 | -2.25157 |
| N | -2.55289 | -1.80979 | -0.15164 |
| C | -1.9517  | -3.00046 | -0.52467 |
| C | -3.83597 | -2.13014 | 0.27256  |
| C | -2.88406 | -4.09028 | -0.34465 |
| C | -4.04676 | -3.55351 | 0.13353  |
| H | -2.66318 | -5.12402 | -0.56485 |
| H | -4.96483 | -4.06127 | 0.38904  |
| N | -3.32822 | 0.75822  | 0.79359  |
| C | -5.44544 | 0.99396  | 1.69694  |
| H | -6.43849 | 0.71972  | 2.02043  |
| C | -4.50887 | 0.08468  | 1.0775   |
| C | -1.44409 | 3.00799  | 0.28116  |
| C | 0.25058  | 2.20873  | -0.91677 |
| C | 0.18661  | -2.08246 | -1.28147 |
| C | -4.75289 | -1.25322 | 0.82366  |
| H | -5.72126 | -1.65037 | 1.10496  |
| C | -2.62949 | 3.11395  | 0.98638  |
| H | -2.90326 | 4.09248  | 1.36356  |
| C | 1.13211  | 1.3468   | -1.54584 |
| H | 2.0327   | 1.75634  | -1.98854 |
| C | -0.66682 | -3.13724 | -1.02077 |
| H | -0.32731 | -4.13522 | -1.27214 |
| C | -4.83351 | 2.21461  | 1.77737  |
| H | -5.22885 | 3.13779  | 2.17428  |
| C | -3.51964 | 2.07394  | 1.19173  |
| C | 5.3075   | 1.10275  | -1.8474  |
| H | 6.27277  | 1.19564  | -2.37595 |
| O | 4.26819  | 1.53799  | -2.38728 |
| C | 5.37385  | 0.45078  | -0.54514 |
| C | 4.21545  | 0.31695  | 0.25287  |
| C | 6.60602  | -0.05117 | -0.08785 |
| C | 4.31508  | -0.32716 | 1.47192  |
| H | 3.27773  | 0.7286   | -0.09287 |

|                                    |          |          |          |
|------------------------------------|----------|----------|----------|
| C                                  | 6.6998   | -0.69015 | 1.14782  |
| H                                  | 7.49015  | 0.06049  | -0.70774 |
| C                                  | 5.5541   | -0.82938 | 1.93054  |
| H                                  | 7.63576  | -1.08486 | 1.52154  |
| O                                  | 3.27437  | -0.53849 | 2.37384  |
| O                                  | 5.62498  | -1.45589 | 3.14926  |
| H                                  | 4.73425  | -1.46128 | 3.56333  |
| C                                  | 1.94281  | -0.29986 | 2.02021  |
| H                                  | 1.25605  | -0.44601 | 2.83531  |
| H                                  | 1.64585  | -0.38533 | 0.98583  |
| H                                  | -1.61284 | -0.12191 | 2.20762  |
| <b><sup>4</sup>INT<sub>B</sub></b> |          |          |          |
| Fe                                 | 1.70276  | 0.00418  | 0.14326  |
| O                                  | 0.96285  | -0.27801 | -1.49058 |
| S                                  | 2.79688  | 0.3121   | 2.16707  |
| H                                  | 2.56309  | 1.66724  | 2.29144  |
| N                                  | 0.96125  | 1.86208  | 0.27048  |
| C                                  | 0.60276  | 4.12577  | -0.06035 |
| C                                  | -0.44202 | 3.65584  | 0.68565  |
| H                                  | 0.77914  | 5.13255  | -0.40878 |
| H                                  | -1.29575 | 4.1961   | 1.0662   |
| N                                  | 0.07549  | -0.71286 | 1.03856  |
| C                                  | -0.97935 | 0.02074  | 1.56652  |
| C                                  | -1.95338 | -0.8774  | 2.14852  |
| C                                  | -1.48315 | -2.14834 | 1.97356  |
| H                                  | -2.86586 | -0.54515 | 2.61767  |
| H                                  | -1.93517 | -3.07901 | 2.28273  |
| N                                  | 2.54111  | -1.81528 | 0.178    |
| C                                  | 1.9282   | -2.99452 | 0.56804  |
| C                                  | 3.82126  | -2.15408 | -0.24024 |
| C                                  | 2.8504   | -4.0956  | 0.40548  |
| C                                  | 4.01848  | -3.57708 | -0.07976 |
| H                                  | 2.61955  | -5.12377 | 0.64096  |
| H                                  | 4.9319   | -4.09725 | -0.32682 |
| N                                  | 3.34233  | 0.7319   | -0.80181 |
| C                                  | 5.46352  | 0.93424  | -1.70422 |
| H                                  | 6.45406  | 0.64551  | -2.02275 |
| C                                  | 4.51636  | 0.0425   | -1.07541 |
| C                                  | 1.48108  | 3.00754  | -0.32105 |
| C                                  | -0.22794 | 2.23978  | 0.8773   |
| C                                  | -0.20416 | -2.04614 | 1.30417  |
| C                                  | 4.74701  | -1.29402 | -0.80313 |
| H                                  | 5.71176  | -1.70436 | -1.0778  |
| C                                  | 2.66981  | 3.09272  | -1.02354 |
| H                                  | 2.95497  | 4.06377  | -1.41142 |
| C                                  | -1.12141 | 1.39471  | 1.51213  |

|                                       |          |          |          |
|---------------------------------------|----------|----------|----------|
| H                                     | -2.0208  | 1.81849  | 1.9437   |
| C                                     | 0.64102  | -3.11211 | 1.063    |
| H                                     | 0.29194  | -4.10308 | 1.32858  |
| C                                     | 4.86503  | 2.16035  | -1.79987 |
| H                                     | 5.27087  | 3.07455  | -2.20683 |
| C                                     | 3.54885  | 2.04078  | -1.21473 |
| C                                     | -5.30405 | 1.17759  | 1.81528  |
| H                                     | -6.26707 | 1.2936   | 2.34341  |
| O                                     | -4.26012 | 1.62199  | 2.33855  |
| C                                     | -5.37879 | 0.48591  | 0.53416  |
| C                                     | -4.22415 | 0.32155  | -0.26362 |
| C                                     | -6.61508 | -0.02425 | 0.09752  |
| C                                     | -4.3313  | -0.36071 | -1.46109 |
| H                                     | -3.28321 | 0.73997  | 0.06496  |
| C                                     | -6.71651 | -0.70167 | -1.11694 |
| H                                     | -7.49634 | 0.11122  | 0.71677  |
| C                                     | -5.57438 | -0.87151 | -1.89879 |
| H                                     | -7.65572 | -1.10358 | -1.47449 |
| O                                     | -3.29494 | -0.6058  | -2.35934 |
| O                                     | -5.65244 | -1.5367  | -3.09644 |
| H                                     | -4.76303 | -1.55954 | -3.51283 |
| C                                     | -1.96121 | -0.36051 | -2.01612 |
| H                                     | -1.27787 | -0.52443 | -2.83088 |
| H                                     | -1.66071 | -0.42678 | -0.98123 |
| H                                     | 1.61694  | -0.14365 | -2.20947 |
| <b><sup>4</sup>TS-reb<sub>B</sub></b> |          |          |          |
| Fe                                    | 1.30386  | -0.00853 | 0.31288  |
| O                                     | 0.57047  | -0.02741 | -1.41998 |
| S                                     | 2.28566  | -0.08634 | 2.45012  |
| H                                     | 2.90674  | 1.1449   | 2.37486  |
| N                                     | 1.36617  | 1.98429  | 0.33491  |
| C                                     | 1.97829  | 4.1773   | -0.08208 |
| C                                     | 0.80269  | 4.21047  | 0.61542  |
| H                                     | 2.56325  | 5.00718  | -0.44953 |
| H                                     | 0.23172  | 5.07263  | 0.92574  |
| N                                     | -0.52813 | 0.04073  | 1.11046  |
| C                                     | -1.20772 | 1.1583   | 1.57493  |
| C                                     | -2.48698 | 0.75807  | 2.11571  |
| C                                     | -2.58197 | -0.59664 | 1.97203  |
| H                                     | -3.21765 | 1.44118  | 2.52022  |
| H                                     | -3.40276 | -1.24345 | 2.24152  |
| N                                     | 1.28749  | -2.01426 | 0.37932  |
| C                                     | 0.2063   | -2.81763 | 0.70705  |
| C                                     | 2.33767  | -2.87067 | 0.07157  |
| C                                     | 0.58607  | -4.20637 | 0.59735  |
| C                                     | 1.90138  | -4.23917 | 0.22164  |

|                                     |          |          |          |
|-------------------------------------|----------|----------|----------|
| H                                   | -0.07533 | -5.03623 | 0.79651  |
| H                                   | 2.52671  | -5.10162 | 0.04525  |
| N                                   | 3.1466   | -0.06392 | -0.50492 |
| C                                   | 5.21749  | -0.78659 | -1.24012 |
| H                                   | 6.02333  | -1.46726 | -1.47103 |
| C                                   | 3.95172  | -1.18471 | -0.67048 |
| C                                   | 2.33612  | 2.78885  | -0.25503 |
| C                                   | 0.41085  | 2.84313  | 0.86167  |
| C                                   | -1.35068 | -1.05008 | 1.36373  |
| C                                   | 3.5859   | -2.48826 | -0.38695 |
| H                                   | 4.31298  | -3.2688  | -0.57823 |
| C                                   | 3.49587  | 2.34889  | -0.86568 |
| H                                   | 4.17026  | 3.09832  | -1.26311 |
| C                                   | -0.76812 | 2.46358  | 1.47613  |
| H                                   | -1.4163  | 3.24533  | 1.85343  |
| C                                   | -1.03146 | -2.37351 | 1.13913  |
| H                                   | -1.78477 | -3.11881 | 1.36384  |
| C                                   | 5.17333  | 0.56911  | -1.42151 |
| H                                   | 5.93864  | 1.21643  | -1.82311 |
| C                                   | 3.88785  | 1.02319  | -0.94452 |
| C                                   | -6.39609 | -0.24254 | 0.08153  |
| H                                   | -7.06876 | 0.58037  | 0.38884  |
| O                                   | -6.75414 | -1.42743 | 0.22878  |
| C                                   | -5.11426 | 0.18195  | -0.47267 |
| C                                   | -4.18914 | -0.76939 | -0.93536 |
| C                                   | -4.77958 | 1.54759  | -0.53837 |
| C                                   | -2.96055 | -0.36886 | -1.43035 |
| H                                   | -4.44153 | -1.82263 | -0.90848 |
| C                                   | -3.53708 | 1.94409  | -1.01364 |
| H                                   | -5.49416 | 2.29054  | -0.19549 |
| C                                   | -2.5834  | 1.00018  | -1.44301 |
| H                                   | -3.24137 | 2.98559  | -1.04144 |
| O                                   | -2.10497 | -1.40611 | -1.86012 |
| O                                   | -1.37683 | 1.46175  | -1.84644 |
| C                                   | -1.35656 | -1.28309 | -3.00392 |
| H                                   | 1.11231  | -0.47866 | -2.09281 |
| H                                   | -0.77259 | -2.15874 | -3.23318 |
| H                                   | -1.52253 | -0.45347 | -3.67562 |
| H                                   | -0.56792 | 0.81304  | -1.73665 |
| <b><sup>2</sup>P-OH<sub>B</sub></b> |          |          |          |
| Fe                                  | -0.73909 | -0.09968 | 0.80602  |
| S                                   | -1.45904 | -0.41247 | 2.93371  |
| H                                   | -1.17532 | 0.8602   | 3.39244  |
| N                                   | -1.64067 | 1.64849  | 0.56604  |
| C                                   | -2.10858 | 3.92134  | 0.47411  |
| C                                   | -3.29146 | 3.25909  | 0.29919  |

|   |          |          |          |
|---|----------|----------|----------|
| H | -1.93459 | 4.98697  | 0.49595  |
| H | -4.27422 | 3.67582  | 0.13601  |
| N | -2.31856 | -1.01698 | -0.0139  |
| C | -3.61429 | -0.4919  | -0.07211 |
| C | -4.53491 | -1.51603 | -0.49658 |
| C | -3.80733 | -2.65649 | -0.71425 |
| H | -5.59639 | -1.36763 | -0.6284  |
| H | -4.16227 | -3.62118 | -1.04509 |
| N | 0.25623  | -1.81141 | 0.72692  |
| C | -0.15172 | -3.02433 | 0.1779   |
| C | 1.47746  | -2.06137 | 1.34054  |
| C | 0.85987  | -4.03196 | 0.4089   |
| C | 1.84964  | -3.44614 | 1.14897  |
| H | 0.79276  | -5.05521 | 0.07073  |
| H | 2.75713  | -3.89289 | 1.52728  |
| N | 0.91355  | 0.84661  | 1.33582  |
| C | 2.99667  | 1.26904  | 2.27413  |
| H | 3.96888  | 1.06188  | 2.69373  |
| C | 2.04129  | 0.253    | 1.89256  |
| C | -1.08401 | 2.9192   | 0.66416  |
| C | -2.99977 | 1.84352  | 0.34249  |
| C | -2.43524 | -2.35836 | -0.38948 |
| C | 2.27798  | -1.10823 | 1.94508  |
| H | 3.20925  | -1.4379  | 2.38951  |
| C | 0.23131  | 3.18608  | 1.00514  |
| H | 0.53659  | 4.22449  | 1.07063  |
| C | -3.92816 | 0.8428   | 0.11113  |
| H | -4.9638  | 1.13783  | -0.01397 |
| C | -1.39666 | -3.27302 | -0.37276 |
| H | -1.60048 | -4.27672 | -0.72798 |
| C | 2.45647  | 2.47726  | 1.93132  |
| H | 2.8876   | 3.46028  | 2.04952  |
| C | 1.14904  | 2.21782  | 1.37034  |
| C | -0.92111 | -0.27473 | -3.48662 |
| H | -0.80911 | 0.44097  | -4.29381 |
| H | -1.50427 | -1.15037 | -3.78153 |
| O | 0.38335  | -0.87499 | -3.16851 |
| C | 1.37502  | -0.12599 | -2.54366 |
| C | 2.29097  | -0.84555 | -1.77968 |
| C | 1.5363   | 1.26906  | -2.65961 |
| C | 3.3422   | -0.20091 | -1.11149 |
| H | 2.15515  | -1.91808 | -1.6992  |
| C | 2.55428  | 1.92101  | -1.948   |
| C | 3.45541  | 1.1986   | -1.17783 |
| H | 2.64671  | 2.99998  | -2.03441 |
| H | 4.25122  | 1.68784  | -0.6312  |

|                                     |          |          |          |
|-------------------------------------|----------|----------|----------|
| C                                   | 4.29024  | -0.98944 | -0.32628 |
| O                                   | 5.19453  | -0.51384 | 0.38831  |
| H                                   | 4.15544  | -2.08378 | -0.39326 |
| O                                   | 0.70182  | 1.95946  | -3.5247  |
| H                                   | 0.66754  | 2.91153  | -3.31528 |
| O                                   | -1.48379 | 0.43031  | -2.40038 |
| H                                   | -1.7534  | -0.1679  | -1.66512 |
| <b><sup>4</sup>P-OH<sub>B</sub></b> |          |          |          |
| Fe                                  | -0.87876 | -0.08392 | 0.80344  |
| S                                   | -1.63836 | -0.4463  | 2.98203  |
| H                                   | -2.70017 | 0.43815  | 2.97227  |
| N                                   | -2.29189 | 1.22318  | 0.32963  |
| C                                   | -3.46227 | 3.19055  | 0.00309  |
| C                                   | -4.33672 | 2.16253  | -0.20785 |
| H                                   | -3.65035 | 4.25191  | -0.0615  |
| H                                   | -5.37716 | 2.21657  | -0.49128 |
| N                                   | -1.97054 | -1.559   | -0.18436 |
| C                                   | -3.33693 | -1.48645 | -0.4557  |
| C                                   | -3.81517 | -2.78998 | -0.84904 |
| C                                   | -2.751   | -3.65294 | -0.78578 |
| H                                   | -4.83495 | -3.01168 | -1.12685 |
| H                                   | -2.74146 | -4.7127  | -0.99318 |
| N                                   | 0.60225  | -1.37954 | 1.06241  |
| C                                   | 0.60711  | -2.73186 | 0.73836  |
| C                                   | 1.79341  | -1.1221  | 1.73232  |
| C                                   | 1.82587  | -3.33433 | 1.23704  |
| C                                   | 2.54222  | -2.35356 | 1.86458  |
| H                                   | 2.08275  | -4.37616 | 1.11649  |
| H                                   | 3.51148  | -2.42498 | 2.33366  |
| N                                   | 0.44545  | 1.45211  | 1.10952  |
| C                                   | 2.24132  | 2.64951  | 1.93613  |
| H                                   | 3.20101  | 2.83988  | 2.39317  |
| C                                   | 1.68191  | 1.33233  | 1.72282  |
| C                                   | -2.17797 | 2.60857  | 0.33261  |
| C                                   | -3.59918 | 0.92814  | -0.04125 |
| C                                   | -1.61036 | -2.89533 | -0.32692 |
| C                                   | 2.28567  | 0.1314   | 2.06067  |
| H                                   | 3.26273  | 0.17134  | 2.52705  |
| C                                   | -1.02918 | 3.34106  | 0.5945   |
| H                                   | -1.11391 | 4.42147  | 0.55319  |
| C                                   | -4.09346 | -0.32816 | -0.36447 |
| H                                   | -5.14314 | -0.394   | -0.62726 |
| C                                   | -0.39059 | -3.42427 | 0.06655  |
| H                                   | -0.22862 | -4.48351 | -0.09842 |
| C                                   | 1.33402  | 3.55808  | 1.45907  |
| H                                   | 1.40257  | 4.63607  | 1.46762  |

|   |          |          |          |
|---|----------|----------|----------|
| C | 0.19342  | 2.80647  | 0.97612  |
| C | -0.53319 | -0.19169 | -3.53872 |
| H | -0.45705 | 0.69486  | -4.15831 |
| H | -1.03432 | -1.01728 | -4.04937 |
| O | 0.80269  | -0.74991 | -3.29434 |
| C | 1.71913  | -0.06653 | -2.50111 |
| C | 2.63579  | -0.85731 | -1.81221 |
| C | 1.80186  | 1.33414  | -2.37482 |
| C | 3.61808  | -0.28253 | -0.99286 |
| H | 2.54828  | -1.93399 | -1.90508 |
| C | 2.76696  | 1.90986  | -1.53676 |
| C | 3.67084  | 1.11462  | -0.84743 |
| H | 2.79842  | 2.99019  | -1.43438 |
| H | 4.41689  | 1.54721  | -0.19274 |
| C | 4.53525  | -1.1441  | -0.24872 |
| O | 5.32492  | -0.74685 | 0.631    |
| H | 4.48153  | -2.21747 | -0.5001  |
| O | 0.93551  | 2.11885  | -3.12065 |
| H | 0.84523  | 3.01421  | -2.74356 |
| O | -1.18587 | 0.20712  | -2.35025 |
| H | -1.42404 | -0.55491 | -1.77117 |

### Path C

#### <sup>2</sup>RC<sub>c</sub>

|    |          |          |          |
|----|----------|----------|----------|
| Fe | -1.31642 | 0.02881  | -0.18858 |
| O  | -0.68951 | 0.07213  | 1.34922  |
| S  | -2.14255 | -0.36556 | -2.52252 |
| H  | -1.0489  | 0.15119  | -3.19038 |
| N  | -0.19252 | 1.57062  | -0.81475 |
| C  | 0.6587   | 3.7156   | -1.05229 |
| C  | 1.59774  | 2.85144  | -1.54111 |
| H  | 0.70185  | 4.79291  | -0.99691 |
| H  | 2.5694   | 3.07556  | -1.95378 |
| N  | 0.07101  | -1.24577 | -0.90232 |
| C  | 1.29722  | -0.92397 | -1.48118 |
| C  | 2.05911  | -2.12841 | -1.72349 |
| C  | 1.31559  | -3.17409 | -1.26238 |
| H  | 3.04629  | -2.14667 | -2.15988 |
| H  | 1.56646  | -4.22404 | -1.25921 |
| N  | -2.53037 | -1.53006 | 0.17883  |
| C  | -2.17918 | -2.86824 | 0.18067  |
| C  | -3.85809 | -1.47939 | 0.58453  |
| C  | -3.30567 | -3.67291 | 0.59933  |
| C  | -4.34516 | -2.81762 | 0.83399  |
| H  | -3.29098 | -4.74936 | 0.68107  |
| H  | -5.34918 | -3.05352 | 1.15341  |
| N  | -2.81371 | 1.29293  | 0.23265  |

|                        |          |          |          |
|------------------------|----------|----------|----------|
| C                      | -4.84501 | 2.16733  | 0.92401  |
| H                      | -5.87387 | 2.1834   | 1.25096  |
| C                      | -4.09623 | 0.96555  | 0.63034  |
| C                      | -0.45946 | 2.91751  | -0.60413 |
| C                      | 1.06795  | 1.5168   | -1.38303 |
| C                      | 0.07821  | -2.6292  | -0.74848 |
| C                      | -4.59105 | -0.32297 | 0.76957  |
| H                      | -5.62267 | -0.42952 | 1.08606  |
| C                      | -1.63496 | 3.42849  | -0.08691 |
| H                      | -1.71069 | 4.50545  | 0.01298  |
| C                      | 1.75303  | 0.35586  | -1.71428 |
| H                      | 2.74636  | 0.46469  | -2.13328 |
| C                      | -0.95176 | -3.37634 | -0.2168  |
| H                      | -0.81063 | -4.44936 | -0.15286 |
| C                      | -4.0015  | 3.2231   | 0.71769  |
| H                      | -4.20301 | 4.27712  | 0.83642  |
| C                      | -2.73827 | 2.67346  | 0.27858  |
| C                      | 6.37939  | -0.20025 | -0.18053 |
| H                      | 7.09684  | 0.6229   | -0.35989 |
| O                      | 6.68046  | -1.36768 | -0.49706 |
| C                      | 5.11204  | 0.20467  | 0.42191  |
| C                      | 4.13486  | -0.75657 | 0.74177  |
| C                      | 4.85045  | 1.56381  | 0.68181  |
| C                      | 2.91789  | -0.37109 | 1.28056  |
| H                      | 4.33005  | -1.80573 | 0.55607  |
| C                      | 3.62632  | 1.95603  | 1.2106   |
| H                      | 5.6075   | 2.30782  | 0.45053  |
| C                      | 2.63254  | 1.00286  | 1.48905  |
| H                      | 3.38569  | 2.99709  | 1.38576  |
| O                      | 1.94263  | -1.34638 | 1.49751  |
| O                      | 1.43213  | 1.4504   | 1.95168  |
| H                      | 0.63906  | 0.84521  | 1.76792  |
| C                      | 1.50742  | -1.56451 | 2.88326  |
| H                      | 0.63349  | -2.20811 | 2.80678  |
| H                      | 2.30647  | -2.05632 | 3.44802  |
| H                      | 1.22903  | -0.62411 | 3.36358  |
| <b><sup>4</sup>RCc</b> |          |          |          |
| Fe                     | -1.31031 | 0.02119  | -0.19628 |
| O                      | -0.69423 | 0.09957  | 1.34673  |
| S                      | -2.13793 | -0.35196 | -2.51246 |
| H                      | -1.05841 | 0.19171  | -3.1818  |
| N                      | -0.18762 | 1.5676   | -0.82155 |
| C                      | 0.65655  | 3.71476  | -1.06552 |
| C                      | 1.60074  | 2.85198  | -1.54658 |
| H                      | 0.69565  | 4.79244  | -1.01434 |
| H                      | 2.57324  | 3.0778   | -1.95636 |



|   |          |          |          |
|---|----------|----------|----------|
| N | 0.08023  | -1.24771 | -0.90051 |
| C | 1.30539  | -0.92431 | -1.48155 |
| C | 2.06746  | -2.12804 | -1.72678 |
| C | 1.32429  | -3.17519 | -1.26848 |
| H | 3.05441  | -2.14494 | -2.16378 |
| H | 1.57511  | -4.22516 | -1.26876 |
| N | -2.51992 | -1.5364  | 0.17958  |
| C | -2.16933 | -2.87454 | 0.17756  |
| C | -3.84767 | -1.48655 | 0.58626  |
| C | -3.29509 | -3.68021 | 0.59542  |
| C | -4.33425 | -2.82527 | 0.83337  |
| H | -3.28037 | -4.75685 | 0.67459  |
| H | -5.33795 | -3.06187 | 1.15331  |
| N | -2.81026 | 1.287    | 0.23045  |
| C | -4.83965 | 2.15934  | 0.92994  |
| H | -5.86656 | 2.17411  | 1.26303  |
| C | -4.08969 | 0.95815  | 0.63519  |
| C | -0.46054 | 2.91455  | -0.61773 |
| C | 1.07452  | 1.51615  | -1.38547 |
| C | 0.08712  | -2.63205 | -0.75253 |
| C | -4.58162 | -0.3313  | 0.77536  |
| H | -5.61213 | -0.44008 | 1.09474  |
| C | -1.63823 | 3.42399  | -0.10412 |
| H | -1.71771 | 4.50129  | -0.01078 |
| C | 1.76169  | 0.35547  | -1.71319 |
| H | 2.75577  | 0.46437  | -2.13038 |
| C | -0.9417  | -3.38112 | -0.22186 |
| H | -0.79982 | -4.4542  | -0.16058 |
| C | -3.99994 | 3.21616  | 0.71467  |
| H | -4.20299 | 4.27016  | 0.83096  |
| C | -2.7377  | 2.66759  | 0.27009  |
| C | 6.3615   | -0.2204  | -0.17502 |
| H | 7.08596  | 0.59615  | -0.3563  |
| O | 6.65161  | -1.3908  | -0.4909  |
| C | 5.09852  | 0.19629  | 0.42867  |
| C | 4.11344  | -0.7561  | 0.75046  |
| C | 4.84866  | 1.55804  | 0.68673  |
| C | 2.90013  | -0.35928 | 1.28922  |
| H | 4.2993   | -1.80711 | 0.56577  |
| C | 3.62813  | 1.96161  | 1.21529  |
| H | 5.61186  | 2.29523  | 0.45383  |
| C | 2.62635  | 1.01731  | 1.49515  |
| H | 3.39647  | 3.00499  | 1.38872  |
| O | 1.91626  | -1.32555 | 1.50806  |
| O | 1.42923  | 1.47538  | 1.95615  |
| H | 0.63268  | 0.87525  | 1.77337  |

|                                      |          |          |          |
|--------------------------------------|----------|----------|----------|
| C                                    | 1.48308  | -1.54057 | 2.89495  |
| H                                    | 0.60438  | -2.17789 | 2.82068  |
| H                                    | 2.27999  | -2.03812 | 3.45767  |
| H                                    | 1.21307  | -0.59799 | 3.37594  |
| <b><sup>2</sup>TS1-H<sub>C</sub></b> |          |          |          |
| Fe                                   | 1.27439  | -0.01992 | 0.28721  |
| O                                    | 0.63834  | 0.14601  | -1.37355 |
| S                                    | 2.2381   | 0.02866  | 2.418    |
| H                                    | 1.24902  | 0.76486  | 3.03918  |
| N                                    | -0.52397 | 0.32095  | 1.11974  |
| C                                    | -2.434   | 1.36294  | 1.91262  |
| C                                    | -2.60222 | 0.01848  | 2.09615  |
| H                                    | -3.1218  | 2.16142  | 2.14473  |
| H                                    | -3.45743 | -0.5011  | 2.50076  |
| N                                    | 0.94516  | -1.98365 | 0.37355  |
| C                                    | -0.16235 | -2.62273 | 0.91986  |
| C                                    | -0.01864 | -4.05212 | 0.77427  |
| C                                    | 1.17863  | -4.27908 | 0.15467  |
| H                                    | -0.74782 | -4.77389 | 1.11047  |
| H                                    | 1.6286   | -5.22458 | -0.10908 |
| N                                    | 3.13354  | -0.3569  | -0.36478 |
| C                                    | 3.69528  | -1.5811  | -0.68682 |
| C                                    | 4.09979  | 0.60279  | -0.6362  |
| C                                    | 5.04956  | -1.38709 | -1.15177 |
| C                                    | 5.30137  | -0.04408 | -1.11146 |
| H                                    | 5.70784  | -2.18439 | -1.46301 |
| H                                    | 6.20505  | 0.47763  | -1.38889 |
| N                                    | 1.58673  | 1.9749   | 0.19171  |
| C                                    | 2.56567  | 4.03948  | -0.17307 |
| H                                    | 3.32588  | 4.76023  | -0.43451 |
| C                                    | 2.75782  | 2.60506  | -0.19415 |
| C                                    | -1.13728 | 1.55585  | 1.30746  |
| C                                    | -1.41686 | -0.63272 | 1.59009  |
| C                                    | 1.79343  | -2.99164 | -0.07375 |
| C                                    | 3.93363  | 1.97271  | -0.55168 |
| H                                    | 4.77943  | 2.59689  | -0.81572 |
| C                                    | -0.59888 | 2.7863   | 0.97889  |
| H                                    | -1.20658 | 3.66454  | 1.16171  |
| C                                    | -1.24801 | -2.00201 | 1.50598  |
| H                                    | -2.0421  | -2.63107 | 1.89016  |
| C                                    | 3.06512  | -2.80874 | -0.58164 |
| H                                    | 3.62152  | -3.68961 | -0.87981 |
| C                                    | 1.27954  | 4.26837  | 0.22558  |
| H                                    | 0.77634  | 5.21409  | 0.36025  |
| C                                    | 0.67213  | 2.97736  | 0.46911  |
| C                                    | -6.29299 | -0.19224 | 0.09932  |

|   |          |          |          |
|---|----------|----------|----------|
| H | -7.0237  | 0.62749  | 0.22988  |
| O | -6.56801 | -1.34156 | 0.49241  |
| C | -5.03402 | 0.19424  | -0.53622 |
| C | -4.04762 | -0.76424 | -0.79381 |
| C | -4.78472 | 1.5388   | -0.87538 |
| C | -2.83341 | -0.40703 | -1.37143 |
| H | -4.22846 | -1.80402 | -0.54983 |
| C | -3.56217 | 1.90352  | -1.4161  |
| H | -5.54675 | 2.29019  | -0.69054 |
| C | -2.54301 | 0.95741  | -1.65468 |
| H | -3.32866 | 2.93329  | -1.65651 |
| O | -1.98051 | -1.50126 | -1.57451 |
| O | -1.37805 | 1.43821  | -2.16087 |
| C | -0.87939 | -1.50282 | -2.43941 |
| H | 0.07192  | -0.85451 | -1.88088 |
| H | -0.53957 | -2.5293  | -2.551   |
| H | -1.02811 | -0.94499 | -3.36615 |
| H | -0.5012  | 0.99398  | -1.83449 |

**<sup>4</sup>TS1-H<sub>C</sub>**

|    |          |          |          |
|----|----------|----------|----------|
| Fe | 1.30264  | 0.04551  | 0.26683  |
| O  | 0.61255  | 0.06957  | -1.38644 |
| S  | 2.30842  | -0.26077 | 2.40007  |
| H  | 1.20024  | -0.76052 | 3.05517  |
| N  | -0.50744 | 0.24688  | 1.13319  |
| C  | -2.4552  | 1.17642  | 1.97781  |
| C  | -2.58486 | -0.18204 | 2.07225  |
| H  | -3.16908 | 1.93727  | 2.25293  |
| H  | -3.42762 | -0.75059 | 2.43486  |
| N  | 1.06203  | -1.98459 | 0.3387   |
| C  | -0.03372 | -2.69061 | 0.81413  |
| C  | 0.17444  | -4.10888 | 0.61949  |
| C  | 1.39881  | -4.25764 | 0.02937  |
| H  | -0.53147 | -4.87522 | 0.90267  |
| H  | 1.89687  | -5.17093 | -0.26009 |
| N  | 3.16839  | -0.19652 | -0.38655 |
| C  | 3.78709  | -1.39781 | -0.71981 |
| C  | 4.09183  | 0.80112  | -0.6579  |
| C  | 5.12998  | -1.13808 | -1.18725 |
| C  | 5.32093  | 0.21429  | -1.14099 |
| H  | 5.8234   | -1.90203 | -1.50574 |
| H  | 6.19963  | 0.77724  | -1.41797 |
| N  | 1.52541  | 2.01795  | 0.22744  |
| C  | 2.39014  | 4.14847  | -0.09399 |
| H  | 3.10636  | 4.91386  | -0.35275 |
| C  | 2.64924  | 2.72475  | -0.16683 |
| C  | -1.16245 | 1.43967  | 1.39109  |

|                                       |          |          |          |
|---------------------------------------|----------|----------|----------|
| C                                     | -1.37571 | -0.76204 | 1.53541  |
| C                                     | 1.95561  | -2.93127 | -0.13343 |
| C                                     | 3.85196  | 2.161    | -0.5538  |
| H                                     | 4.66004  | 2.83378  | -0.81796 |
| C                                     | -0.66749 | 2.7048   | 1.11003  |
| H                                     | -1.30422 | 3.55058  | 1.34297  |
| C                                     | -1.15882 | -2.12154 | 1.38407  |
| H                                     | -1.94691 | -2.78946 | 1.71203  |
| C                                     | 3.21767  | -2.65475 | -0.63464 |
| H                                     | 3.82132  | -3.49608 | -0.95668 |
| C                                     | 1.11045  | 4.29984  | 0.35335  |
| H                                     | 0.567    | 5.21432  | 0.53789  |
| C                                     | 0.5756   | 2.97112  | 0.57102  |
| C                                     | -6.38644 | -0.1386  | 0.06957  |
| H                                     | -7.09726 | 0.69825  | 0.20402  |
| O                                     | -6.70214 | -1.28827 | 0.4321   |
| C                                     | -5.10655 | 0.2275   | -0.5322  |
| C                                     | -4.13795 | -0.75074 | -0.79079 |
| C                                     | -4.81596 | 1.57045  | -0.84001 |
| C                                     | -2.90191 | -0.41736 | -1.33304 |
| H                                     | -4.3514  | -1.78969 | -0.57008 |
| C                                     | -3.57531 | 1.91045  | -1.35559 |
| H                                     | -5.56104 | 2.33882  | -0.65523 |
| C                                     | -2.57461 | 0.94364  | -1.59374 |
| H                                     | -3.31231 | 2.93738  | -1.57773 |
| O                                     | -2.06211 | -1.52923 | -1.50641 |
| O                                     | -1.39491 | 1.41217  | -2.07515 |
| C                                     | -0.96891 | -1.57223 | -2.38714 |
| H                                     | 0.04944  | -0.88269 | -1.8254  |
| H                                     | -0.63902 | -2.60468 | -2.4685  |
| H                                     | -1.1174  | -1.03699 | -3.32701 |
| H                                     | -0.5227  | 0.92704  | -1.78702 |
| <b><sup>2</sup>INT1-H<sub>C</sub></b> |          |          |          |
| Fe                                    | -1.69815 | 0.00183  | -0.14549 |
| O                                     | -0.95741 | -0.26239 | 1.49105  |
| S                                     | -2.79559 | 0.29489  | -2.16896 |
| H                                     | -2.5714  | 1.65118  | -2.29856 |
| N                                     | -0.93849 | 1.85026  | -0.29861 |
| C                                     | -0.5562  | 4.11426  | 0.00202  |
| C                                     | 0.47963  | 3.62495  | -0.74398 |
| H                                     | -0.72083 | 5.12698  | 0.33879  |
| H                                     | 1.33629  | 4.15213  | -1.13611 |
| N                                     | -0.08083 | -0.74292 | -1.03539 |
| C                                     | 0.97774  | -0.02649 | -1.57948 |
| C                                     | 1.94163  | -0.94171 | -2.15173 |
| C                                     | 1.46164  | -2.20576 | -1.95494 |

|   |          |          |          |
|---|----------|----------|----------|
| H | 2.85474  | -0.62439 | -2.63001 |
| H | 1.90454  | -3.14487 | -2.25157 |
| N | -2.55289 | -1.80979 | -0.15164 |
| C | -1.9517  | -3.00046 | -0.52467 |
| C | -3.83597 | -2.13014 | 0.27256  |
| C | -2.88406 | -4.09028 | -0.34465 |
| C | -4.04676 | -3.55351 | 0.13353  |
| H | -2.66318 | -5.12402 | -0.56485 |
| H | -4.96483 | -4.06127 | 0.38904  |
| N | -3.32822 | 0.75822  | 0.79359  |
| C | -5.44544 | 0.99396  | 1.69694  |
| H | -6.43849 | 0.71972  | 2.02043  |
| C | -4.50887 | 0.08468  | 1.0775   |
| C | -1.44409 | 3.00799  | 0.28116  |
| C | 0.25058  | 2.20873  | -0.91677 |
| C | 0.18661  | -2.08246 | -1.28147 |
| C | -4.75289 | -1.25322 | 0.82366  |
| H | -5.72126 | -1.65037 | 1.10496  |
| C | -2.62949 | 3.11395  | 0.98638  |
| H | -2.90326 | 4.09248  | 1.36356  |
| C | 1.13211  | 1.3468   | -1.54584 |
| H | 2.0327   | 1.75634  | -1.98854 |
| C | -0.66682 | -3.13724 | -1.02077 |
| H | -0.32731 | -4.13522 | -1.27214 |
| C | -4.83351 | 2.21461  | 1.77737  |
| H | -5.22885 | 3.13779  | 2.17428  |
| C | -3.51964 | 2.07394  | 1.19173  |
| C | 5.3075   | 1.10275  | -1.8474  |
| H | 6.27277  | 1.19564  | -2.37595 |
| O | 4.26819  | 1.53799  | -2.38728 |
| C | 5.37385  | 0.45078  | -0.54514 |
| C | 4.21545  | 0.31695  | 0.25287  |
| C | 6.60602  | -0.05117 | -0.08785 |
| C | 4.31508  | -0.32716 | 1.47192  |
| H | 3.27773  | 0.7286   | -0.09287 |
| C | 6.6998   | -0.69015 | 1.14782  |
| H | 7.49015  | 0.06049  | -0.70774 |
| C | 5.5541   | -0.82938 | 1.93054  |
| H | 7.63576  | -1.08486 | 1.52154  |
| O | 3.27437  | -0.53849 | 2.37384  |
| O | 5.62498  | -1.45589 | 3.14926  |
| H | 4.73425  | -1.46128 | 3.56333  |
| C | 1.94281  | -0.29986 | 2.02021  |
| H | 1.25605  | -0.44601 | 2.83531  |
| H | 1.64585  | -0.38533 | 0.98583  |
| H | -1.61284 | -0.12191 | 2.20762  |

**<sup>4</sup>INT1-H<sub>c</sub>**

|    |          |          |          |
|----|----------|----------|----------|
| Fe | 1.70276  | 0.00418  | 0.14326  |
| O  | 0.96285  | -0.27801 | -1.49058 |
| S  | 2.79688  | 0.3121   | 2.16707  |
| H  | 2.56309  | 1.66724  | 2.29144  |
| N  | 0.96125  | 1.86208  | 0.27048  |
| C  | 0.60276  | 4.12577  | -0.06035 |
| C  | -0.44202 | 3.65584  | 0.68565  |
| H  | 0.77914  | 5.13255  | -0.40878 |
| H  | -1.29575 | 4.1961   | 1.0662   |
| N  | 0.07549  | -0.71286 | 1.03856  |
| C  | -0.97935 | 0.02074  | 1.56652  |
| C  | -1.95338 | -0.8774  | 2.14852  |
| C  | -1.48315 | -2.14834 | 1.97356  |
| H  | -2.86586 | -0.54515 | 2.61767  |
| H  | -1.93517 | -3.07901 | 2.28273  |
| N  | 2.54111  | -1.81528 | 0.178    |
| C  | 1.9282   | -2.99452 | 0.56804  |
| C  | 3.82126  | -2.15408 | -0.24024 |
| C  | 2.8504   | -4.0956  | 0.40548  |
| C  | 4.01848  | -3.57708 | -0.07976 |
| H  | 2.61955  | -5.12377 | 0.64096  |
| H  | 4.9319   | -4.09725 | -0.32682 |
| N  | 3.34233  | 0.7319   | -0.80181 |
| C  | 5.46352  | 0.93424  | -1.70422 |
| H  | 6.45406  | 0.64551  | -2.02275 |
| C  | 4.51636  | 0.0425   | -1.07541 |
| C  | 1.48108  | 3.00754  | -0.32105 |
| C  | -0.22794 | 2.23978  | 0.8773   |
| C  | -0.20416 | -2.04614 | 1.30417  |
| C  | 4.74701  | -1.29402 | -0.80313 |
| H  | 5.71176  | -1.70436 | -1.0778  |
| C  | 2.66981  | 3.09272  | -1.02354 |
| H  | 2.95497  | 4.06377  | -1.41142 |
| C  | -1.12141 | 1.39471  | 1.51213  |
| H  | -2.0208  | 1.81849  | 1.9437   |
| C  | 0.64102  | -3.11211 | 1.063    |
| H  | 0.29194  | -4.10308 | 1.32858  |
| C  | 4.86503  | 2.16035  | -1.79987 |
| H  | 5.27087  | 3.07455  | -2.20683 |
| C  | 3.54885  | 2.04078  | -1.21473 |
| C  | -5.30405 | 1.17759  | 1.81528  |
| H  | -6.26707 | 1.2936   | 2.34341  |
| O  | -4.26012 | 1.62199  | 2.33855  |
| C  | -5.37879 | 0.48591  | 0.53416  |
| C  | -4.22415 | 0.32155  | -0.26362 |

|   |          |          |          |
|---|----------|----------|----------|
| C | -6.61508 | -0.02425 | 0.09752  |
| C | -4.3313  | -0.36071 | -1.46109 |
| H | -3.28321 | 0.73997  | 0.06496  |
| C | -6.71651 | -0.70167 | -1.11694 |
| H | -7.49634 | 0.11122  | 0.71677  |
| C | -5.57438 | -0.87151 | -1.89879 |
| H | -7.65572 | -1.10358 | -1.47449 |
| O | -3.29494 | -0.6058  | -2.35934 |
| O | -5.65244 | -1.5367  | -3.09644 |
| H | -4.76303 | -1.55954 | -3.51283 |
| C | -1.96121 | -0.36051 | -2.01612 |
| H | -1.27787 | -0.52443 | -2.83088 |
| H | -1.66071 | -0.42678 | -0.98123 |
| H | 1.61694  | -0.14365 | -2.20947 |

**<sup>2</sup>TS2-H<sub>C</sub>**

|    |          |          |          |
|----|----------|----------|----------|
| Fe | 1.35513  | -0.00276 | 0.28334  |
| O  | 0.56717  | -0.03696 | -1.45335 |
| S  | 2.40068  | -0.00352 | 2.3671   |
| H  | 1.88921  | -1.19603 | 2.84132  |
| N  | -0.44139 | -0.34504 | 1.13686  |
| C  | -2.53411 | -0.01595 | 2.08851  |
| C  | -2.34572 | -1.36546 | 1.98184  |
| H  | -3.39957 | 0.51278  | 2.45685  |
| H  | -3.02516 | -2.15963 | 2.24862  |
| N  | 1.63931  | -1.98624 | 0.15831  |
| C  | 0.76148  | -2.99708 | 0.51771  |
| C  | 1.33989  | -4.28875 | 0.21521  |
| C  | 2.5685   | -4.05617 | -0.33328 |
| H  | 0.8554   | -5.23567 | 0.39951  |
| H  | 3.29232  | -4.77498 | -0.6868  |
| N  | 3.17099  | 0.35099  | -0.50871 |
| C  | 4.07823  | -0.61008 | -0.92079 |
| C  | 3.77754  | 1.57433  | -0.74965 |
| C  | 5.28021  | 0.02399  | -1.41975 |
| C  | 5.09546  | 1.37316  | -1.31138 |
| H  | 6.14102  | -0.5066  | -1.79807 |
| H  | 5.77438  | 2.16734  | -1.58344 |
| N  | 1.06098  | 1.99414  | 0.40115  |
| C  | 1.33216  | 4.29711  | 0.28518  |
| H  | 1.80219  | 5.24653  | 0.07687  |
| C  | 1.92834  | 3.0075   | 0.02116  |
| C  | -1.34611 | 0.61834  | 1.55726  |
| C  | -1.04146 | -1.56209 | 1.38849  |
| C  | 2.75023  | -2.61941 | -0.3716  |
| C  | 3.19505  | 2.80846  | -0.50992 |
| H  | 3.777    | 3.69059  | -0.75438 |

|                                      |          |          |          |
|--------------------------------------|----------|----------|----------|
| C                                    | -1.16705 | 1.98593  | 1.45352  |
| H                                    | -1.9726  | 2.61723  | 1.8117   |
| C                                    | -0.48549 | -2.7984  | 1.08482  |
| H                                    | -1.07958 | -3.67799 | 1.30599  |
| C                                    | 3.87499  | -1.98052 | -0.86962 |
| H                                    | 4.67295  | -2.61096 | -1.24728 |
| C                                    | 0.10399  | 4.06036  | 0.84108  |
| H                                    | -0.63125 | 4.77706  | 1.17456  |
| C                                    | -0.05375 | 2.62554  | 0.91969  |
| C                                    | -6.47009 | 0.09494  | -0.10834 |
| H                                    | -7.18208 | -0.73648 | 0.05386  |
| O                                    | -6.82133 | 1.2704   | 0.13022  |
| C                                    | -4.17447 | 0.67255  | -0.85515 |
| C                                    | -4.8397  | -1.66267 | -0.78369 |
| C                                    | -2.91665 | 0.29565  | -1.28319 |
| H                                    | -4.42801 | 1.71303  | -0.69045 |
| C                                    | -3.5694  | -2.03916 | -1.18873 |
| H                                    | -5.599   | -2.41739 | -0.59653 |
| C                                    | -2.54754 | -1.08176 | -1.42227 |
| H                                    | -3.2993  | -3.07967 | -1.32383 |
| O                                    | -1.9089  | 1.23541  | -1.56546 |
| O                                    | -1.32812 | -1.49223 | -1.73206 |
| H                                    | -0.37524 | -0.73637 | -1.62626 |
| C                                    | -2.23154 | 2.57008  | -1.76454 |
| H                                    | -1.35873 | 3.19699  | -1.86738 |
| H                                    | 0.37401  | 0.85595  | -1.78787 |
| H                                    | -3.18487 | 2.80751  | -2.22212 |
| <b><sup>4</sup>TS2-H<sub>C</sub></b> |          |          |          |
| Fe                                   | 1.35513  | -0.00276 | 0.28334  |
| O                                    | 0.56717  | -0.03696 | -1.45335 |
| S                                    | 2.40068  | -0.00352 | 2.3671   |
| H                                    | 1.88921  | -1.19603 | 2.84132  |
| N                                    | -0.44139 | -0.34504 | 1.13686  |
| C                                    | -2.53411 | -0.01595 | 2.08851  |
| C                                    | -2.34572 | -1.36546 | 1.98184  |
| H                                    | -3.39957 | 0.51278  | 2.45685  |
| H                                    | -3.02516 | -2.15963 | 2.24862  |
| N                                    | 1.63931  | -1.98624 | 0.15831  |
| C                                    | 0.76148  | -2.99708 | 0.51771  |
| C                                    | 1.33989  | -4.28875 | 0.21521  |
| C                                    | 2.5685   | -4.05617 | -0.33328 |
| H                                    | 0.8554   | -5.23567 | 0.39951  |
| H                                    | 3.29232  | -4.77498 | -0.6868  |
| N                                    | 3.17099  | 0.35099  | -0.50871 |
| C                                    | 4.07823  | -0.61008 | -0.92079 |
| C                                    | 3.77754  | 1.57433  | -0.74965 |



|   |          |          |          |
|---|----------|----------|----------|
| C | 5.28021  | 0.02399  | -1.41975 |
| C | 5.09546  | 1.37316  | -1.31138 |
| H | 6.14102  | -0.5066  | -1.79807 |
| H | 5.77438  | 2.16734  | -1.58344 |
| N | 1.06098  | 1.99414  | 0.40115  |
| C | 1.33216  | 4.29711  | 0.28518  |
| H | 1.80219  | 5.24653  | 0.07687  |
| C | 1.92834  | 3.0075   | 0.02116  |
| C | -1.34611 | 0.61834  | 1.55726  |
| C | -1.04146 | -1.56209 | 1.38849  |
| C | 2.75023  | -2.61941 | -0.3716  |
| C | 3.19505  | 2.80846  | -0.50992 |
| H | 3.777    | 3.69059  | -0.75438 |
| C | -1.16705 | 1.98593  | 1.45352  |
| H | -1.9726  | 2.61723  | 1.8117   |
| C | -0.48549 | -2.7984  | 1.08482  |
| H | -1.07958 | -3.67799 | 1.30599  |
| C | 3.87499  | -1.98052 | -0.86962 |
| H | 4.67295  | -2.61096 | -1.24728 |
| C | 0.10399  | 4.06036  | 0.84108  |
| H | -0.63125 | 4.77706  | 1.17456  |
| C | -0.05375 | 2.62554  | 0.91969  |
| C | -6.47009 | 0.09494  | -0.10834 |
| H | -7.18208 | -0.73648 | 0.05386  |
| O | -6.82133 | 1.2704   | 0.13022  |
| C | -5.15749 | -0.30294 | -0.59146 |
| C | -4.17447 | 0.67255  | -0.85515 |
| C | -4.8397  | -1.66267 | -0.78369 |
| C | -2.91665 | 0.29565  | -1.28319 |
| H | -4.42801 | 1.71303  | -0.69045 |
| C | -3.5694  | -2.03916 | -1.18873 |
| H | -5.599   | -2.41739 | -0.59653 |
| C | -2.54754 | -1.08176 | -1.42227 |
| H | -3.2993  | -3.07967 | -1.32383 |
| O | -1.9089  | 1.23541  | -1.56546 |
| O | -1.32812 | -1.49223 | -1.73206 |
| H | -0.37524 | -0.73637 | -1.62626 |
| C | -2.23154 | 2.57008  | -1.76454 |
| H | -1.35873 | 3.19699  | -1.86738 |
| H | 0.37401  | 0.85595  | -1.78787 |
| H | -3.18487 | 2.80751  | -2.22212 |

#### <sup>4</sup>INT2-H<sub>C</sub>

|    |         |          |          |
|----|---------|----------|----------|
| Fe | 1.40428 | -0.00195 | 0.30409  |
| O  | 0.57396 | -0.05543 | -1.49677 |
| S  | 2.42586 | 0.0487   | 2.35563  |

|   |          |          |          |
|---|----------|----------|----------|
| H | 1.87656  | -1.11242 | 2.86464  |
| N | -0.39493 | -0.36471 | 1.13247  |
| C | -2.47893 | -0.06366 | 2.10789  |
| C | -2.30059 | -1.4101  | 1.93842  |
| H | -3.3361  | 0.45287  | 2.51238  |
| H | -2.98082 | -2.2116  | 2.18154  |
| N | 1.70296  | -1.9808  | 0.1525   |
| C | 0.81893  | -3.00107 | 0.46724  |
| C | 1.42503  | -4.28482 | 0.18647  |
| C | 2.67984  | -4.03626 | -0.29333 |
| H | 0.94275  | -5.23806 | 0.34274  |
| H | 3.42927  | -4.74591 | -0.61062 |
| N | 3.19083  | 0.3757   | -0.54297 |
| C | 4.13345  | -0.57437 | -0.90125 |
| C | 3.74974  | 1.60317  | -0.8476  |
| C | 5.31159  | 0.07724  | -1.43654 |
| C | 5.07312  | 1.4217   | -1.40717 |
| H | 6.19195  | -0.44052 | -1.78705 |
| H | 5.71996  | 2.2255   | -1.72567 |
| N | 1.06312  | 1.98892  | 0.37964  |
| C | 1.2968   | 4.29499  | 0.23792  |
| H | 1.74046  | 5.25001  | -0.00119 |
| C | 1.89737  | 3.01292  | -0.05533 |
| C | -1.2904  | 0.58816  | 1.59849  |
| C | -0.99942 | -1.5887  | 1.33474  |
| C | 2.84583  | -2.59739 | -0.32291 |
| C | 3.14078  | 2.83227  | -0.63716 |
| H | 3.69277  | 3.72013  | -0.92554 |
| C | -1.11687 | 1.95734  | 1.53247  |
| H | -1.90823 | 2.57899  | 1.93589  |
| C | -0.44741 | -2.81842 | 0.99438  |
| H | -1.0468  | -3.70255 | 1.17923  |
| C | 3.9752   | -1.94585 | -0.79699 |
| H | 4.79944  | -2.5662  | -1.13208 |
| C | 0.11051  | 4.04436  | 0.87271  |
| H | -0.6108  | 4.75352  | 1.25051  |
| C | -0.02662 | 2.6074   | 0.96335  |
| C | -6.57667 | 0.17565  | -0.14163 |
| H | -7.32153 | -0.62575 | 0.01349  |
| O | -6.88558 | 1.36661  | 0.07068  |
| C | -5.26347 | -0.27145 | -0.58984 |
| C | -4.24375 | 0.67281  | -0.82846 |
| C | -4.99793 | -1.64848 | -0.77308 |
| C | -2.99177 | 0.25459  | -1.23043 |
| H | -4.46736 | 1.71943  | -0.66234 |
| C | -3.74283 | -2.07336 | -1.15795 |

|                                  |          |          |          |
|----------------------------------|----------|----------|----------|
| H                                | -5.79203 | -2.36866 | -0.59703 |
| C                                | -2.66961 | -1.14942 | -1.37731 |
| H                                | -3.50727 | -3.12279 | -1.28775 |
| O                                | -1.95209 | 1.14569  | -1.49912 |
| O                                | -1.47759 | -1.58253 | -1.66175 |
| H                                | -0.21976 | -0.69827 | -1.5963  |
| C                                | -2.20778 | 2.50923  | -1.63231 |
| H                                | -1.30621 | 3.1013   | -1.65372 |
| H                                | 0.2817   | 0.83094  | -1.77062 |
| H                                | -3.1313  | 2.81201  | -2.11157 |
| <b><sup>2</sup>P<sub>c</sub></b> |          |          |          |
| Fe                               | -1.33741 | 0.1431   | 0.30606  |
| O                                | -0.65678 | -0.05987 | -1.61908 |
| S                                | -2.2053  | 0.38651  | 2.39275  |
| H                                | -1.04973 | 0.13135  | 3.10595  |
| N                                | -0.33984 | -1.5341  | 0.81783  |
| C                                | 0.12405  | -3.75299 | 1.31255  |
| C                                | 1.2088   | -3.01658 | 1.70882  |
| H                                | -0.02655 | -4.8196  | 1.39461  |
| H                                | 2.12632  | -3.36289 | 2.1602   |
| N                                | 0.29718  | 1.2063   | 0.79993  |
| C                                | 1.46071  | 0.75615  | 1.40874  |
| C                                | 2.32915  | 1.87701  | 1.7001   |
| C                                | 1.69012  | 3.00272  | 1.26169  |
| H                                | 3.29701  | 1.7931   | 2.1714   |
| H                                | 2.02683  | 4.02782  | 1.31308  |
| N                                | -2.28816 | 1.79633  | -0.32922 |
| C                                | -1.7812  | 3.08512  | -0.28057 |
| C                                | -3.58215 | 1.90794  | -0.81557 |
| C                                | -2.7761  | 4.0221   | -0.76534 |
| C                                | -3.88635 | 3.29736  | -1.09127 |
| H                                | -2.62945 | 5.09019  | -0.83032 |
| H                                | -4.83007 | 3.65201  | -1.47864 |
| N                                | -2.93648 | -0.94077 | -0.28503 |
| C                                | -5.06482 | -1.58434 | -0.95196 |
| H                                | -6.07833 | -1.4899  | -1.31297 |
| C                                | -4.15684 | -0.47439 | -0.75665 |
| C                                | -0.84685 | -2.82594 | 0.76775  |
| C                                | 0.91641  | -1.63343 | 1.40651  |
| C                                | 0.41956  | 2.5836   | 0.70494  |
| C                                | -4.45869 | 0.85335  | -1.01098 |
| H                                | -5.45004 | 1.08326  | -1.38482 |
| C                                | -2.10024 | -3.18963 | 0.29877  |
| H                                | -2.35478 | -4.2435  | 0.33157  |
| C                                | 1.75687  | -0.56735 | 1.68449  |
| H                                | 2.7104   | -0.78528 | 2.15103  |

|                                  |          |          |          |
|----------------------------------|----------|----------|----------|
| C                                | -0.52958 | 3.44909  | 0.18506  |
| H                                | -0.28366 | 4.50542  | 0.17269  |
| C                                | -4.39497 | -2.71952 | -0.59187 |
| H                                | -4.75258 | -3.73872 | -0.59742 |
| C                                | -3.06953 | -2.31797 | -0.16691 |
| C                                | 5.83938  | 1.57165  | -0.15459 |
| H                                | 5.77325  | 2.66292  | -0.31423 |
| O                                | 6.81504  | 1.08275  | 0.44079  |
| C                                | 4.71085  | 0.79493  | -0.68039 |
| C                                | 4.70081  | -0.61301 | -0.52312 |
| C                                | 3.64288  | 1.46683  | -1.29778 |
| C                                | 3.60142  | -1.2791  | -1.01069 |
| H                                | 5.52428  | -1.11276 | -0.03052 |
| C                                | 2.52461  | 0.77229  | -1.78373 |
| H                                | 3.67146  | 2.54792  | -1.37459 |
| C                                | 2.54788  | -0.59909 | -1.6257  |
| H                                | 1.66892  | 1.27553  | -2.21107 |
| H                                | 0.03355  | -0.75599 | -1.75896 |
| H                                | -1.42189 | -0.1577  | -2.21222 |
| C                                | 2.04582  | -2.86579 | -1.62939 |
| H                                | 2.21007  | -3.42393 | -2.55189 |
| H                                | 1.34053  | -3.33473 | -0.94787 |
| O                                | 1.54248  | -1.51291 | -1.98654 |
| O                                | 3.32315  | -2.65366 | -0.94499 |
| <b><sup>4</sup>P<sub>c</sub></b> |          |          |          |
| Fe                               | -1.32562 | 0.13132  | 0.32767  |
| O                                | -0.64285 | -0.07427 | -1.74045 |
| S                                | -2.22361 | 0.31092  | 2.48175  |
| H                                | -1.2139  | 1.0644   | 3.04859  |
| N                                | -0.23617 | -1.63533 | 0.76111  |
| C                                | 0.24315  | -3.82919 | 1.28945  |
| C                                | 1.31387  | -3.06904 | 1.69161  |
| H                                | 0.11377  | -4.89705 | 1.39152  |
| H                                | 2.22481  | -3.40343 | 2.16535  |
| N                                | 0.28189  | 1.22609  | 0.83057  |
| C                                | 1.43986  | 0.7626   | 1.44268  |
| C                                | 2.28861  | 1.89762  | 1.75059  |
| C                                | 1.64519  | 3.02312  | 1.3121   |
| H                                | 3.25573  | 1.82418  | 2.22538  |
| H                                | 1.98222  | 4.04774  | 1.3717   |
| N                                | -2.30306 | 1.85199  | -0.39843 |
| C                                | -1.80597 | 3.13527  | -0.3441  |
| C                                | -3.59759 | 1.92157  | -0.86352 |
| C                                | -2.82153 | 4.05721  | -0.83126 |
| C                                | -3.92513 | 3.31052  | -1.14805 |
| H                                | -2.70338 | 5.12881  | -0.90052 |

|   |          |          |          |
|---|----------|----------|----------|
| H | -4.87536 | 3.65799  | -1.52669 |
| N | -2.90833 | -0.98744 | -0.25043 |
| C | -5.03587 | -1.62748 | -0.87646 |
| H | -6.05585 | -1.54217 | -1.22147 |
| C | -4.13155 | -0.50645 | -0.70365 |
| C | -0.74038 | -2.91886 | 0.72438  |
| C | 1.00014  | -1.68707 | 1.37457  |
| C | 0.38243  | 2.60722  | 0.73041  |
| C | -4.4424  | 0.82143  | -0.99654 |
| H | -5.44716 | 1.01203  | -1.35898 |
| C | -2.02377 | -3.24927 | 0.28941  |
| H | -2.29604 | -4.29938 | 0.32068  |
| C | 1.77291  | -0.56881 | 1.68168  |
| H | 2.72908  | -0.74805 | 2.16087  |
| C | -0.55818 | 3.47413  | 0.17312  |
| H | -0.29858 | 4.52791  | 0.17659  |
| C | -4.35614 | -2.76303 | -0.53011 |
| H | -4.71616 | -3.78142 | -0.53633 |
| C | -3.01793 | -2.36826 | -0.13161 |
| C | 5.70026  | 1.699    | -0.11977 |
| H | 5.58402  | 2.78803  | -0.26632 |
| O | 6.69076  | 1.2497   | 0.48293  |
| C | 4.61619  | 0.87773  | -0.66903 |
| C | 4.67026  | -0.53126 | -0.53165 |
| C | 3.52184  | 1.50818  | -1.28437 |
| C | 3.60605  | -1.24024 | -1.03653 |
| H | 5.51237  | -0.9996  | -0.03971 |
| C | 2.43901  | 0.77059  | -1.78612 |
| H | 3.50072  | 2.59049  | -1.34463 |
| C | 2.52571  | -0.60112 | -1.64933 |
| H | 1.55971  | 1.23729  | -2.20698 |
| H | 0.01521  | -0.8045  | -1.85105 |
| H | -1.4531  | -0.23331 | -2.25706 |
| C | 2.1203   | -2.88572 | -1.67429 |
| H | 2.30198  | -3.44277 | -2.594   |
| H | 1.43386  | -3.37714 | -0.98904 |
| O | 1.56883  | -1.55439 | -2.03534 |
| O | 3.39246  | -2.62711 | -0.99421 |
